# Supplementary material
Source: PubMed Central journal article supplement (PMC4793667)

## SUPPLEMENTARY FILE

**Supplementary table A** Search strategy used in the literature review for Medline and Embase (Search limited to humans and English language)

|                        |                                                                                                                                                                                                                                                                                                                                                                                                                                                                                                                                                                                                                                                                                       |
|------------------------|---------------------------------------------------------------------------------------------------------------------------------------------------------------------------------------------------------------------------------------------------------------------------------------------------------------------------------------------------------------------------------------------------------------------------------------------------------------------------------------------------------------------------------------------------------------------------------------------------------------------------------------------------------------------------------------|
| <b>Medline</b>         |                                                                                                                                                                                                                                                                                                                                                                                                                                                                                                                                                                                                                                                                                       |
| <b>Vitamin D terms</b> | Vitamin d/ or 25-OHD.mp. or 25 hydroxyvitamin D.mp. or cholecalciferol/ or colecalciferol.mp. or hydroxycholecalciferols/ or hydroxycholecalciferols.mp. or calcifediol/ or dihydroxycholecalciferols/ or dihydroxycholecalciferols.mp. or calcitriol/ or 24,25-dihydroxyvitamin d 3/ or 24,25-OH2 D3.mp. or ergocalciferols/ or dihydrotachysterol/ or 25-hydroxyvitamin d 2/ or 25-OHD2.mp. or 1,25-dihydroxyvitamin d.mp. or 1,25-OH2 D.mp. or 1,25-dihydroxyvitamin d2.mp. or 1,25-dihydroxyergocalciferol.mp. or 1,25-OH2 D2.mp. or 1,25-dihydroxyvitamin d3.mp. or 1,25-OH2 D3.mp. or ergocalciferols/ or vitamin D2.mp. or vitamin D 2.mp. or vitamin D3.mp. or vitamin D 3.mp |
|                        | <b>AND</b>                                                                                                                                                                                                                                                                                                                                                                                                                                                                                                                                                                                                                                                                            |
| <b>Review terms</b>    | Review Literature as Topic/ or systematic review.mp or meta-analysis/ or meta-analysis.mp                                                                                                                                                                                                                                                                                                                                                                                                                                                                                                                                                                                             |
|                        |                                                                                                                                                                                                                                                                                                                                                                                                                                                                                                                                                                                                                                                                                       |
| <b>Embase</b>          |                                                                                                                                                                                                                                                                                                                                                                                                                                                                                                                                                                                                                                                                                       |
| <b>Vitamin D terms</b> | Vitamin d/ or 25-OHD.mp. or 25 hydroxyvitamin D/ or colecalciferol/ or cholecalciferol.mp. or hydroxycholecalciferols/ or hydroxycholecalciferols.mp. or calcifediol/ or dihydroxycholecalciferols/ or dihydroxycholecalciferols.mp. or calcitriol/ or 24,25 dihydroxycholecalciferol/ or 24,25-OH2 D3.mp. or ergocalciferol/ or dihydrotachysterol/ or 25-hydroxyvitamin d 2.mp. or 25-OHD2.mp. or 1,25-dihydroxyvitamin d.mp. or 1,25-OH2 D.mp. or 1,25 dihydroxyergocalciferol/ or 1,25-dihydroxyvitamin d2.mp. or 1,25-OH2 D2.mp. or 1,25-dihydroxyvitamin d3.mp. or 1,25-OH2 D3.mp. or ergocalciferol/ or vitamin D2.mp. or vitamin D 2.mp. or vitamin D3.mp. or vitamin D 3.mp  |
|                        | <b>AND</b>                                                                                                                                                                                                                                                                                                                                                                                                                                                                                                                                                                                                                                                                            |
| <b>Review terms</b>    | systematic review / or systematic review.mp or meta-analysis/ or meta-analysis.mp                                                                                                                                                                                                                                                                                                                                                                                                                                                                                                                                                                                                     |

**Supplementary table B** Map of 137 non-overlapping meta-analyses or systematic reviews (SR: Systematic review; MA: meta-analysis; RCTs: Randomised clinical trials)

| Meta-analyses                                                          | Number of SR | Author's interpretation (in most recent SR) | Number of MA (observational studies) | Significant summary effect (in most recent MA) | Number of MA (RCTs) | Significant summary effect (in most recent MA) |
|------------------------------------------------------------------------|--------------|---------------------------------------------|--------------------------------------|------------------------------------------------|---------------------|------------------------------------------------|
| <b>Autoimmune diseases</b>                                             |              |                                             |                                      |                                                |                     |                                                |
| Ankylosing spondylitis <sup>49</sup>                                   | 1            | Suggestive                                  |                                      |                                                |                     |                                                |
| Crohn's disease <sup>49</sup>                                          | 1            | Suggestive                                  |                                      |                                                |                     |                                                |
| Multiple Sclerosis <sup>49 56</sup>                                    | 2            | Suggestive                                  |                                      |                                                |                     |                                                |
| Osteoarthritis <sup>64</sup>                                           | 1            | Suggestive                                  |                                      |                                                |                     |                                                |
| Rheumatoid arthritis <sup>49 56</sup>                                  | 2            | Inconclusive                                |                                      |                                                |                     |                                                |
| Rheumatoid arthritis activity <sup>60</sup>                            | 1            | Definite                                    |                                      |                                                |                     |                                                |
| Scleroderma <sup>49 56</sup>                                           | 2            | Inconclusive                                |                                      |                                                |                     |                                                |
| Systemic Lupus Erythematosus <sup>49 56 59</sup>                       | 3            | Suggestive                                  |                                      |                                                |                     |                                                |
| Thyroid autoimmunity <sup>49</sup>                                     | 1            | Inconclusive                                |                                      |                                                |                     |                                                |
| Type 1 diabetes <sup>49 56</sup>                                       | 2            | Suggestive                                  |                                      |                                                |                     |                                                |
| Type 1 diabetes in childhood (maternal vitamin D status) <sup>46</sup> | 1            | Inconclusive                                |                                      |                                                |                     |                                                |
| Vitiligo <sup>49</sup>                                                 | 1            | Inconclusive                                |                                      |                                                |                     |                                                |
| <b>Cancer outcomes</b>                                                 |              |                                             |                                      |                                                |                     |                                                |
| Aggressive prostate cancer <sup>76</sup>                               |              |                                             | 1                                    | no                                             |                     |                                                |
| Aggressive prostate cancer (1,25(OH)2D) <sup>76</sup>                  |              |                                             | 1                                    | no                                             |                     |                                                |
| Breast cancer <sup>47 54 68 70 75 81 94 101</sup>                      | 2            | Inconclusive                                | 6                                    | yes                                            |                     |                                                |
| Breast cancer (1,25(OH)2D) <sup>68</sup>                               |              |                                             | 1                                    | no                                             |                     |                                                |
| Breast cancer prognosis <sup>44</sup>                                  | 1            | Inconclusive                                |                                      |                                                |                     |                                                |
| Breast cancer pre-menopausal <sup>105</sup>                            |              |                                             | 1                                    | no                                             |                     |                                                |
| Breast cancer post-menopausal <sup>105</sup>                           |              |                                             | 1                                    | no                                             |                     |                                                |
| Cancer mortality <sup>47</sup>                                         | 1            | No association                              |                                      |                                                |                     |                                                |
| Colon cancer <sup>35</sup>                                             |              |                                             | 1                                    | no                                             |                     |                                                |
| Colon cancer (1,25(OH)2D) <sup>35</sup>                                |              |                                             | 1                                    | no                                             |                     |                                                |
| Colorectal adenoma <sup>47 72 92 95</sup>                              | 1            | No association                              | 3                                    | yes                                            |                     |                                                |
| Colorectal adenoma recurrence <sup>95</sup>                            |              |                                             | 1                                    | yes                                            |                     |                                                |
| Colorectal cancer <sup>35 47 54 70 75 77 79 90 93</sup>                | 2            | Definite                                    | 7                                    | yes                                            |                     |                                                |
| Colorectal cancer (1,25(OH)2D) <sup>35 47</sup>                        | 1            | No association                              | 1                                    | no                                             |                     |                                                |
| Colorectal cancer prognosis <sup>44</sup>                              | 1            | Inconclusive                                |                                      |                                                |                     |                                                |

|                                                                                |   |                |     |     |   |    |
|--------------------------------------------------------------------------------|---|----------------|-----|-----|---|----|
| Kidney cancer <sup>74</sup>                                                    |   |                | 1   | no  |   |    |
| Lung cancer <sup>54</sup>                                                      | 1 | Inconclusive   |     |     |   |    |
| Melanoma prognosis <sup>44</sup>                                               | 1 | Inconclusive   |     |     |   |    |
| Non-Hodgkin Lymphoma <sup>54 58 86</sup>                                       | 2 | Inconclusive   | 1*  | no  |   |    |
| Non-small cell lung cancer prognosis <sup>44</sup>                             | 1 | Inconclusive   |     |     |   |    |
| Oesophageal cancer <sup>54</sup>                                               | 1 | Inconclusive   |     |     |   |    |
| Ovarian cancer <sup>54 57 96</sup>                                             | 2 | Inconclusive   | 1   | no  |   |    |
| Pancreatic cancer <sup>47 54 88</sup>                                          | 2 | Inconclusive   | 1   | yes |   |    |
| Prostate cancer <sup>47 54 70 75 76 97</sup>                                   | 2 | Inconclusive   | 4   | no  |   |    |
| Prostate cancer (1,25(OH)2D) <sup>47 76</sup>                                  | 1 | Inconclusive   | 1   | no  |   |    |
| Prostate cancer prognosis <sup>44</sup>                                        | 1 | Inconclusive   |     |     |   |    |
| Rectal cancer <sup>35</sup>                                                    |   |                | 1   | yes |   |    |
| Renal cancer <sup>54</sup>                                                     | 1 | Inconclusive   |     |     |   |    |
| Stomach cancer <sup>54</sup>                                                   | 1 | Inconclusive   |     |     |   |    |
| <b>Cardiovascular outcomes</b>                                                 |   |                |     |     |   |    |
| Cardiovascular disease <sup>43 47 52 78 87 102 125 130</sup>                   | 4 | Suggestive     | 3   | yes | 2 | no |
| Cardiovascular disease in ethnic minorities <sup>53</sup>                      | 1 | Suggestive     |     |     |   |    |
| Cardiovascular disease mortality <sup>43 47 78</sup>                           | 2 | Inconclusive   | 1   | yes |   |    |
| Cardiovascular disease prevalence <sup>83</sup>                                |   |                | 1   | yes |   |    |
| Hypertension: Total, diastolic, systolic <sup>43 47 51 52 67 104 126 127</sup> | 4 | Inconclusive   | 3   | yes | 3 | no |
| Hypertension in children <sup>62</sup>                                         | 1 | Definite       |     |     |   |    |
| Ischemic heart disease <sup>66</sup>                                           |   |                | 1   | yes |   |    |
| Ischemic stroke <sup>100</sup>                                                 |   |                | 1** | yes |   |    |
| Myocardial infarction <sup>47</sup>                                            | 1 | No association |     |     |   |    |
| Stroke <sup>47 69 89</sup>                                                     | 1 | No association | 2   | yes |   |    |
| <b>Cognitive disorders</b>                                                     |   |                |     |     |   |    |
| Alzheimer's disease <sup>65 99</sup>                                           |   |                | 2   | yes |   |    |
| Cognition <sup>42 43 71</sup>                                                  | 2 | Inconclusive   | 1   | yes |   |    |
| Depression <sup>43 98</sup>                                                    | 1 | Inconclusive   | 1   | yes |   |    |
| <b>Infectious diseases</b>                                                     |   |                |     |     |   |    |
| Active tuberculosis <sup>82</sup>                                              |   |                | 1   | yes |   |    |
| Acute respiratory infection <sup>63</sup>                                      | 1 | Suggestive     |     |     |   |    |
| Infectious diseases mortality <sup>47</sup>                                    | 1 | Inconclusive   |     |     |   |    |
| <b>Metabolic disorders</b>                                                     |   |                |     |     |   |    |
| Adiposity in children (maternal vitamin D status) <sup>46</sup>                | 1 | No association |     |     |   |    |
| Body mass index <sup>38</sup>                                                  |   |                | 1   | yes |   |    |

|                                                                                                  |   |                |   |     |   |     |
|--------------------------------------------------------------------------------------------------|---|----------------|---|-----|---|-----|
| Metabolic syndrome prevalence <sup>83</sup>                                                      |   |                | 1 | yes |   |     |
| Metabolic syndrome in ethnic minorities <sup>53</sup>                                            | 1 | Inconclusive   |   |     |   |     |
| Metabolites: fasting glucose of diabetes patients with normal glucose tolerance <sup>114</sup>   |   |                |   |     | 1 | no  |
| Metabolites: fasting glucose of diabetes patients with abnormal glucose tolerance <sup>114</sup> |   |                |   |     | 1 | no  |
| Metabolites: HDL <sup>123</sup>                                                                  |   |                |   |     | 1 | no  |
| Metabolites: HDL in children <sup>62</sup>                                                       | 1 | No association |   |     |   |     |
| Metabolites: insulin/glucose metabolism in children <sup>62</sup>                                | 1 | Inconclusive   |   |     |   |     |
| Metabolites: insulin resistance of diabetes patients <sup>114</sup>                              |   |                |   |     | 1 | no  |
| Metabolites: LDL <sup>123</sup>                                                                  |   |                |   |     | 1 | yes |
| Metabolites: LDL in children <sup>62</sup>                                                       | 1 | No association |   |     |   |     |
| Metabolites: total cholesterol <sup>123</sup>                                                    |   |                |   |     | 1 | no  |
| Metabolites: triglycerides <sup>123</sup>                                                        |   |                |   |     | 1 | no  |
| Metabolites: triglycerides in children <sup>62</sup>                                             | 1 | No association |   |     |   |     |
| Obesity in ethnic minorities <sup>53</sup>                                                       | 1 | Suggestive     |   |     |   |     |
| Type 2 diabetes <sup>52 73 80 103</sup>                                                          | 1 | Inconclusive   | 3 | yes |   |     |
| Type 2 diabetes in ethnic minorities <sup>53</sup>                                               | 1 | Suggestive     |   |     |   |     |
| Type 2 diabetes prevalence <sup>11 83</sup>                                                      |   |                | 2 | yes |   |     |
| <b>Neonatal/ infant/ child related outcomes</b>                                                  |   |                |   |     |   |     |
| Allergic rhinitis and atopic dermatitis/eczema (maternal vitamin D status) <sup>46 47</sup>      | 2 | Inconclusive   |   |     |   |     |
| Birth length (maternal vitamin D status) <sup>36 112</sup>                                       |   |                | 1 | no  | 1 | no  |
| Birth weight (maternal vitamin D status) <sup>36 46 47 50 61 112</sup>                           | 4 | Inconclusive   | 1 | yes | 3 | yes |
| Cerebral function and diseases (maternal vitamin D status) <sup>46</sup>                         | 1 | Inconclusive   |   |     |   |     |
| Childhood infections (maternal vitamin D status) <sup>46 61</sup>                                | 2 | Inconclusive   |   |     |   |     |
| Dental caries <sup>128</sup>                                                                     |   |                |   |     | 1 | yes |
| Head circumference (maternal vitamin D status) <sup>36 112</sup>                                 |   |                | 1 | no  | 1 | yes |

|                                                                                 |   |                |   |     |    |     |
|---------------------------------------------------------------------------------|---|----------------|---|-----|----|-----|
| Neonatal and infant growth <sup>61</sup>                                        | 1 | Suggestive     |   |     |    |     |
| Small for gestational age (maternal vitamin D status) <sup>36 61</sup>          | 1 | Inconclusive   | 1 | yes | 1  | no  |
| Wheezing and asthma in childhood (maternal vitamin D status) <sup>46</sup>      | 1 | Inconclusive   |   |     |    |     |
| <b>Pregnancy related outcomes</b>                                               |   |                |   |     |    |     |
| Bacterial vaginosis in pregnant women <sup>36 45</sup>                          | 2 | Definite       |   |     |    |     |
| Caesarean section <sup>36 45</sup>                                              | 2 | No association |   |     |    |     |
| Fertility <sup>45</sup>                                                         | 1 | Inconclusive   |   |     |    |     |
| Gestational diabetes mellitus <sup>36 45 85</sup>                               | 1 | Suggestive     | 2 | yes |    |     |
| Length of gestation/ preterm birth <sup>45 61</sup>                             | 2 | Suggestive     |   |     | 2  | no  |
| Maternal vitamin D levels at term <sup>112</sup>                                |   |                |   |     | 1  | yes |
| Postpartum depression <sup>45</sup>                                             | 1 | Inconclusive   |   |     |    |     |
| Preeclampsia in pregnant women <sup>36 45 47 50 61</sup>                        | 4 | Suggestive     | 1 | yes |    |     |
| Pregnancy-associated breast cancer <sup>45</sup>                                | 1 | Inconclusive   |   |     |    |     |
| <b>Skeletal outcomes</b>                                                        |   |                |   |     |    |     |
| Bone health in pregnant and lactating women <sup>48</sup>                       | 1 | Inconclusive   |   |     |    |     |
| Bone mineral content in infants <sup>48</sup>                                   | 1 | Inconclusive   |   |     |    |     |
| Bone mineral density <sup>48 131</sup>                                          | 1 | Suggestive     |   |     | 1  | no  |
| Bone mineral density in children and adolescents <sup>48 125</sup>              | 1 | Suggestive     |   |     | 1  | no  |
| Bone mineral density in forearm <sup>131</sup>                                  |   |                |   |     | 1  | no  |
| Bone mineral density in forearm in children <sup>125</sup>                      |   |                |   |     | 1  | no  |
| Bone mineral density in femoral neck <sup>131</sup>                             |   |                |   |     | 1  | yes |
| Bone mineral density in hip <sup>131</sup>                                      |   |                |   |     | 1  | no  |
| Bone mineral density in hip in children <sup>125</sup>                          |   |                |   |     | 1  | no  |
| Bone mineral density in lumbar spine <sup>131</sup>                             |   |                |   |     | 1  | no  |
| Bone mineral density in lumbar spine in children <sup>125</sup>                 |   |                |   |     | 1  | no  |
| Bone pain in chronic kidney disease patients requiring dialysis <sup>121</sup>  |   |                |   |     | 1  | no  |
| Falls: risk of falling in older individuals <sup>7 48 109 111 115 117 119</sup> | 1 | Definite       |   |     | 11 | no  |
| Falls: rate of falls in older individuals (D2 or                                |   |                |   |     | 2  | no  |

|                                                                                                       |   |              |       |     |        |        |
|-------------------------------------------------------------------------------------------------------|---|--------------|-------|-----|--------|--------|
| D2 and D3) <sup>111</sup>                                                                             |   |              |       |     |        |        |
| Falls: rate of falls in older individuals (D3 only) <sup>115</sup>                                    |   |              |       |     | 1      | yes*** |
| Fractures in older individuals <sup>48 70 91 107 115 116</sup>                                        | 1 | Inconclusive | 1     | yes | 5      | no     |
| Fractures in chronic kidney disease patients requiring dialysis <sup>121</sup>                        |   |              |       |     | 1      | no     |
| Fractures: hip <sup>37 48 107 108 116</sup>                                                           |   |              | 1**** | yes | 4      | no     |
| Fractures: non-vertebral <sup>5 108</sup>                                                             |   |              |       |     | 2      | yes    |
| Fractures: non-vertebral-no-hip <sup>108</sup>                                                        |   |              |       |     | 1      | no     |
| Fractures: vertebral or deformity <sup>107</sup>                                                      |   |              |       |     | 1      | no     |
| Performance measures in older individuals <sup>48</sup>                                               | 1 | Inconclusive |       |     |        |        |
| Balance sway <sup>118</sup>                                                                           |   |              |       |     | 1      | yes    |
| Lower extremity strength <sup>118</sup>                                                               |   |              |       |     | 1      | no     |
| Muscle strength <sup>118</sup>                                                                        |   |              |       |     | 1      | yes    |
| Rickets in children <sup>48</sup>                                                                     | 1 | Definite     |       |     |        |        |
| <b>Other outcomes</b>                                                                                 |   |              |       |     |        |        |
| Chronic kidney disease patients: Mortality <sup>84 120 121</sup>                                      |   |              | 1     | yes | 1***** | no     |
| Chronic kidney disease patients not requiring dialysis: Alkaline phosphatase levels <sup>120</sup>    |   |              |       |     | 1      | no     |
| Chronic kidney disease patients not requiring dialysis: Creatinine clearance <sup>120</sup>           |   |              |       |     | 1      | no     |
| Chronic kidney disease patients not requiring dialysis: Risk of hypercalcaemia <sup>120</sup>         |   |              |       |     | 1      | yes    |
| Chronic kidney disease patients not requiring dialysis: Risk of hyperphosphataemia <sup>120</sup>     |   |              |       |     | 1      | no     |
| Chronic kidney disease patients not requiring dialysis: Parathyroid hormone levels <sup>120 129</sup> |   |              |       |     | 2      | yes    |
| Chronic kidney disease patients not requiring dialysis: Risk of requiring dialysis <sup>120</sup>     |   |              |       |     | 1      | no     |
| Chronic kidney disease patients requiring dialysis: Alkaline phosphatase levels <sup>121</sup>        |   |              |       |     | 1      | no     |

|                                                                                                   |   |              |   |     |   |     |
|---------------------------------------------------------------------------------------------------|---|--------------|---|-----|---|-----|
| Chronic kidney disease patients requiring dialysis: Parathyroid hormone levels <sup>121 129</sup> |   |              |   |     | 2 | yes |
| Chronic kidney disease patients requiring dialysis: Parathyroidectomy <sup>121</sup>              |   |              |   |     | 1 | no  |
| Chronic kidney disease patients requiring dialysis: Risk of hypercalcaemia <sup>121</sup>         |   |              |   |     | 1 | no  |
| Chronic kidney disease patients requiring dialysis: Risk of hyperphosphataemia <sup>121</sup>     |   |              |   |     | 1 | no  |
| Chronic kidney disease patients requiring dialysis: Subperiosteal erosions <sup>121</sup>         |   |              |   |     | 1 | no  |
| Chronic kidney disease patients requiring dialysis: Vascular calcification <sup>121</sup>         |   |              |   |     | 1 | no  |
| Mammographic breast density <sup>55</sup>                                                         | 1 | Inconclusive |   |     |   |     |
| Mortality <sup>43 47 66 106 110 113 122</sup>                                                     | 2 | Inconclusive | 1 | yes | 5 | no  |

\* Non Hodgkin Lymphoma is presented in 2 meta-analyses of observational data, one for males and one for females

\*\* Ischemic stroke outcome is presented as 2 meta-analyses one for HR and one for OR studies

\*\*\* Vitamin D3 supplementation was associated with increased rate of falls

\*\*\*\* Fractures: hip outcome is presented as 2 meta-analyses one with population controls and one with hospital based controls

\*\*\*\*\* Chronic kidney disease patients: Mortality is presented as 2 meta-analyses one for patients requiring dialysis and one for patients not requiring dialysis

**Supplementary Table C** General characteristics of the 107 systematic reviews of observational studies

| Author                     | Year | Biomarker  | Population                                             | Outcome                                                  | N of studies | Main findings  |
|----------------------------|------|------------|--------------------------------------------------------|----------------------------------------------------------|--------------|----------------|
| <b>Autoimmune diseases</b> |      |            |                                                        |                                                          |              |                |
| Kriegel MA                 | 2011 | 25OHD      | general                                                | Ankylosing spondylitis                                   | 8            | Suggestive     |
| Kriegel MA                 | 2011 | 25OHD      | general                                                | Crohn's disease                                          | 4            | Suggestive     |
| Kriegel MA                 | 2011 | 25OHD      | general                                                | Multiple Sclerosis                                       | 12           | Suggestive     |
| Antico A                   | 2012 | 25OHD      | general                                                | Multiple Sclerosis                                       | 11           | Suggestive     |
| Cao Y                      | 2013 | 25OHD      | general                                                | Osteoarthritis                                           | 13           | Suggestive     |
| Kriegel MA                 | 2011 | 25OHD      | general                                                | Rheumatoid arthritis                                     | 11           | Inconclusive   |
| Antico A                   | 2012 | 25OHD      | general                                                | Rheumatoid arthritis                                     | 7            | Inconclusive   |
| Song GG                    | 2012 | 25OHD      | Rheumatoid arthritis patients                          | Rheumatoid arthritis activity                            | 8            | Definite       |
| Kriegel MA                 | 2011 | 25OHD      | general                                                | Scleroderma                                              | 8            | Inconclusive   |
| Antico A                   | 2012 | 25OHD      | general                                                | Scleroderma                                              | 7            | Inconclusive   |
| Kriegel MA                 | 2011 | 25OHD      | general                                                | Systemic lupus erythematosus                             | 14           | Suggestive     |
| Antico A                   | 2012 | 25OHD      | general                                                | Systemic lupus erythematosus                             | 6            | Suggestive     |
| Sakthiswary R              | 2013 | 25OHD      | general                                                | Systemic lupus erythematosus                             | 22           | Suggestive     |
| Kriegel MA                 | 2011 | 25OHD      | general                                                | Thyroid autoimmunity                                     | 1            | Inconclusive   |
| Kriegel MA                 | 2011 | 25OHD      | general                                                | Type 1 diabetes                                          | 14           | Suggestive     |
| Antico A                   | 2012 | 25OHD      | general                                                | Type 1 diabetes                                          | 10           | Suggestive     |
| Christesen HT              | 2012 | 25OHD      | impact of maternal vitamin D status on children health | Type 1 diabetes in childhood (maternal vitamin D status) | 5            | Inconclusive   |
| Kriegel MA                 | 2011 | 25OHD      | general                                                | Vitiligo                                                 | 1            | Inconclusive   |
| <b>Cancer outcomes</b>     |      |            |                                                        |                                                          |              |                |
| van der Rhee H             | 2009 | 25OHD      | general                                                | Breast cancer                                            | 9            | Inconclusive   |
| Chung M                    | 2009 | 25OHD      | general                                                | Breast cancer                                            | 3            | No association |
| Buttigliero C              | 2011 | 25OHD      | cancer patients                                        | Breast cancer prognosis                                  | 2            | Inconclusive   |
| Chung M                    | 2009 | 25OHD      | general                                                | Cancer mortality                                         | 1            | No association |
| Chung M                    | 2009 | 25OHD      | general                                                | Colorectal adenoma                                       | 1            | No association |
| van der Rhee H             | 2009 | 25OHD      | general                                                | Colorectal cancer                                        | 8            | Definite       |
| Chung M                    | 2009 | 25OHD      | general                                                | Colorectal cancer                                        | 7            | Definite       |
| Chung M                    | 2009 | 1,25(OH)2D | general                                                | Colorectal cancer                                        | 3            | No association |



|                                |      |            |                    |                                             |    |                |
|--------------------------------|------|------------|--------------------|---------------------------------------------|----|----------------|
| Buttigliero C                  | 2011 | 25OHD      | cancer patients    | Colorectal cancer prognosis                 | 2  | Inconclusive   |
| van der Rhee H                 | 2009 | 25OHD      | general            | Lung cancer                                 | 4  | Inconclusive   |
| Buttigliero C                  | 2011 | 25OHD      | cancer patients    | Melanoma prognosis                          | 1  | Inconclusive   |
| van der Rhee H                 | 2009 | 25OHD      | general            | Non-Hodgkin Lymphoma                        | 7  | Inconclusive   |
| Kelly LJ                       | 2009 | 25OHD      | general            | Non-Hodgkin Lymphoma                        | 8  | Inconclusive   |
| Buttigliero C                  | 2011 | 25OHD      | cancer patients    | Non-small cell lung cancer prognosis        | 2  | Inconclusive   |
| van der Rhee H                 | 2009 | 25OHD      | general            | Oesophageal cancer                          | 3  | Inconclusive   |
| van der Rhee H                 | 2009 | 25OHD      | general            | Ovarian cancer                              | 2  | Inconclusive   |
| Cook LS                        | 2010 | 25OHD      | general (women)    | Ovarian cancer                              | 1  | Inconclusive   |
| van der Rhee H                 | 2009 | 25OHD      | general            | Pancreatic cancer                           | 3  | Inconclusive   |
| Chung M                        | 2009 | 25OHD      | general            | Pancreatic cancer                           | 2  | Inconclusive   |
| Chung M                        | 2009 | 25OHD      | general population | Prostate cancer                             | 12 | Inconclusive   |
| van der Rhee H                 | 2009 | 25OHD      | general            | Prostate cancer                             | 17 | Inconclusive   |
| Chung M                        | 2009 | 1,25(OH)2D | general            | Prostate cancer                             | 5  | Inconclusive   |
| Buttigliero C                  | 2011 | 25OHD      | cancer patients    | Prostate cancer prognosis                   | 1  | Inconclusive   |
| van der Rhee H                 | 2009 | 25OHD      | general            | Renal cancer                                | 1  | Inconclusive   |
| van der Rhee H                 | 2009 | 25OHD      | general            | Stomach cancer                              | 1  | Inconclusive   |
| <b>Cardiovascular outcomes</b> |      |            |                    |                                             |    |                |
| Chung M                        | 2009 | 25OHD      | general            | Cardiovascular disease                      | 2  | Suggestive     |
| Pittas AG                      | 2010 | 25OHD      | general            | Cardiovascular disease                      | 7  | Suggestive     |
| Barnard K                      | 2010 | 25OHD      | older adults       | Cardiovascular disease                      | 5  | Inconclusive   |
| Renzaho AM                     | 2011 | 25OHD      | ethnic minorities  | Cardiovascular disease in ethnic minorities | 5  | Suggestive     |
| Chung M                        | 2009 | 25OHD      | general            | Cardiovascular disease mortality            | 1  | No association |
| Barnard K                      | 2010 | 25OHD      | older adults       | Cardiovascular disease mortality            | 6  | Inconclusive   |
| Chung M                        | 2009 | 25OHD      | general            | Hypertension                                | 3  | Inconclusive   |
| Pilz S                         | 2009 | 25OHD      | general            | Hypertension                                | 28 | Inconclusive   |
| Barnard K                      | 2010 | 25OHD      | older adults       | Hypertension                                | 5  | Inconclusive   |
| Pittas AG                      | 2010 | 25OHD      | general            | Hypertension                                | 3  | Suggestive     |
| Dolinsky DH                    | 2013 | 25OHD      | children           | Hypertension in children                    | 14 | Definite       |
| Chung M                        | 2009 | 25OHD      | general            | Myocardial infarction                       | 1  | No association |
| Chung M                        | 2009 | 25OHD      | general            | Stroke                                      | 1  | No association |
| <b>Cognitive disorders</b>     |      |            |                    |                                             |    |                |
| Annweiler C                    | 2009 | 25OHD      | general            | Cognition                                   | 5  | Inconclusive   |
| Barnard K                      | 2010 | 25OHD      | older adults       | Cognition                                   | 5  | Inconclusive   |

|                                                 |      |       |                                                        |                                                                            |    |                |
|-------------------------------------------------|------|-------|--------------------------------------------------------|----------------------------------------------------------------------------|----|----------------|
| Barnard K                                       | 2010 | 25OHD | older adults                                           | Depression                                                                 | 4  | Inconclusive   |
| <b>Infectious diseases</b>                      |      |       |                                                        |                                                                            |    |                |
| Jolliffe DA                                     | 2013 | 25OHD | general                                                | Acute respiratory infection                                                | 25 | Suggestive     |
| Chung M                                         | 2009 | 25OHD | general                                                | Infectious diseases mortality                                              | 1  | Inconclusive   |
| <b>Metabolic disorders</b>                      |      |       |                                                        |                                                                            |    |                |
| Christesen HT                                   | 2012 | 25OHD | impact of maternal vitamin D status on children health | Adiposity in children (maternal vitamin D status)                          | 1  | No association |
| Renzaho AM                                      | 2011 | 25OHD | ethnic minorities                                      | Metabolic syndrome in ethnic minorities                                    | 2  | Inconclusive   |
| Dolinsky DH                                     | 2013 | 25OHD | children                                               | Metabolites: HDL in children                                               | 22 | No association |
| Dolinsky DH                                     | 2013 | 25OHD | children                                               | Metabolites: insulin/glucose metabolism in children                        | 18 | Inconclusive   |
| Dolinsky DH                                     | 2013 | 25OHD | children                                               | Metabolites: LDL in children                                               | 16 | No association |
| Dolinsky DH                                     | 2013 | 25OHD | children                                               | Metabolites: triglycerides in children                                     | 21 | No association |
| Renzaho AM                                      | 2011 | 25OHD | ethnic minorities                                      | Obesity in ethnic minorities                                               | 14 | Suggestive     |
| Pittas AG                                       | 2010 | 25OHD | general                                                | Type 2 diabetes                                                            | 3  | Inconclusive   |
| Renzaho AM                                      | 2011 | 25OHD | ethnic minorities                                      | Type 2 diabetes in ethnic minorities                                       | 5  | Suggestive     |
| <b>Neonatal/ infant/ child related outcomes</b> |      |       |                                                        |                                                                            |    |                |
| Chung M                                         | 2009 | 25OHD | general                                                | Allergic rhinitis and atopic dermatitis/eczema (maternal vitamin D status) | 1  | Inconclusive   |
| Christesen HT                                   | 2012 | 25OHD | impact of maternal vitamin D status on children health | Allergic rhinitis and atopic dermatitis/eczema (maternal vitamin D status) | 5  | Inconclusive   |
| Thorne-Lyman, A                                 | 2012 | 25OHD | pregnant women                                         | Birth weight (maternal vitamin D status)                                   | 2  | Inconclusive   |
| Chung M                                         | 2009 | 25OHD | general                                                | Birth weight (maternal vitamin D status)                                   | 2  | No association |

|                                   |      |       |                                                        |                                                              |    |                |
|-----------------------------------|------|-------|--------------------------------------------------------|--------------------------------------------------------------|----|----------------|
| Christesen HT                     | 2012 | 25OHD | impact of maternal vitamin D status on children health | Birth weight (maternal vitamin D status)                     | 11 | Inconclusive   |
| Nassar N                          | 2011 | 25OHD | Pregnant women                                         | Birth weight (maternal vitamin D status)                     | 3  | Inconclusive   |
| Christesen HT                     | 2012 | 25OHD | impact of maternal vitamin D status on children health | Cerebral function and diseases (maternal vitamin D status)   | 2  | Inconclusive   |
| Thorne-Lyman, A                   | 2012 | 25OHD | pregnant women                                         | Childhood infections (maternal vitamin D status)             | 3  | Inconclusive   |
| Christesen HT                     | 2012 | 25OHD | impact of maternal vitamin D status on children health | Childhood infections (maternal vitamin D status)             | 5  | Inconclusive   |
| Thorne-Lyman, A                   | 2012 | 25OHD | pregnant women                                         | Neonatal and infant growth                                   | 3  | Suggestive     |
| Thorne-Lyman, A                   | 2012 | 25OHD | pregnant women                                         | Small for gestational age (maternal vitamin D status)        | 4  | Inconclusive   |
| Christesen HT                     | 2012 | 25OHD | impact of maternal vitamin D status on children health | Wheezing and asthma in childhood (maternal vitamin D status) | 7  | Inconclusive   |
| <b>Pregnancy related outcomes</b> |      |       |                                                        |                                                              |    |                |
| Aghajafari F                      | 2013 | 25OHD | pregnant women                                         | Bacterial vaginosis in pregnant women                        | 3  | Definite       |
| Christesen HT                     | 2012 | 25OHD | pregnant women                                         | Bacterial vaginosis in pregnant women                        | 4  | Suggestive     |
| Aghajafari F                      | 2013 | 25OHD | pregnant women                                         | Caesarean section                                            | 2  | No association |
| Christesen HT                     | 2012 | 25OHD | pregnant women                                         | Caesarean section                                            | 1  | Inconclusive   |
| Christesen HT                     | 2012 | 25OHD | pregnant women                                         | Fertility                                                    | 2  | Inconclusive   |
| Christesen HT                     | 2012 | 25OHD | pregnant women                                         | Gestational diabetes mellitus                                | 7  | Suggestive     |
| Thorne-Lyman, A                   | 2012 | 25OHD | pregnant women                                         | Length of gestation/preterm birth                            | 2  | Suggestive     |
| Christesen HT                     | 2012 | 25OHD | pregnant women                                         | Length of gestation/preterm birth                            | 9  | Suggestive     |
| Christesen HT                     | 2012 | 25OHD | pregnant women                                         | Postpartum depression                                        | 1  | Inconclusive   |
| Thorne-Lyman, A                   | 2012 | 25OHD | pregnant women                                         | Preeclampsia in pregnant women                               | 2  | Inconclusive   |

|                          |      |       |                                                                           |                                                  |    |              |
|--------------------------|------|-------|---------------------------------------------------------------------------|--------------------------------------------------|----|--------------|
| Christesen HT            | 2012 | 25OHD | pregnant women                                                            | Preeclampsia in pregnant women                   | 10 | Suggestive   |
| Chung M                  | 2009 | 25OHD | pregnant women                                                            | Preeclampsia in pregnant women                   | 1  | Inconclusive |
| Nassar N                 | 2011 | 25OHD | pregnant women                                                            | Preeclampsia in pregnant women                   | 2  | Inconclusive |
| Christesen HT            | 2012 | 25OHD | pregnant women                                                            | Pregnancy-associated breast cancer               | 1  | Inconclusive |
| <b>Skeletal outcomes</b> |      |       |                                                                           |                                                  |    |              |
| Cranney A                | 2007 | 25OHD | children, women of reproductive age, postmenopausal women and elderly men | Bone health in pregnant and lactating women      | 4  | Inconclusive |
| Cranney A                | 2007 | 25OHD | children, women of reproductive age, postmenopausal women and elderly men | Bone mineral content in infants                  | 3  | Inconclusive |
| Cranney A                | 2007 | 25OHD | children, women of reproductive age, postmenopausal women and elderly men | Bone mineral density                             | 13 | Suggestive   |
| Cranney A                | 2007 | 25OHD | children, women of reproductive age, postmenopausal women and elderly men | Bone mineral density in children and adolescents | 5  | Suggestive   |
| Cranney A                | 2007 | 25OHD | children, women of reproductive age, postmenopausal women and elderly men | Falls: risk of falling in older individuals      | 4  | Definite     |
| Cranney A                | 2007 | 25OHD | children, women of reproductive age, postmenopausal women and elderly men | Fractures in older individuals                   | 15 | Inconclusive |

|                       |      |       |                                                                                             |                                                 |    |                   |
|-----------------------|------|-------|---------------------------------------------------------------------------------------------|-------------------------------------------------|----|-------------------|
| Cranney A             | 2007 | 25OHD | children,<br>women of<br>reproductive<br>age,<br>postmenopausal<br>women and<br>elderly men | Performance<br>measures in older<br>individuals | 4  | Inconclusive      |
| Cranney A             | 2007 | 25OHD | children,<br>women of<br>reproductive<br>age,<br>postmenopausal<br>women and<br>elderly men | Rickets in children                             | 12 | Definite          |
| <b>Other outcomes</b> |      |       |                                                                                             |                                                 |    |                   |
| Yaghjian L            | 2012 | 25OHD | general<br>(women)                                                                          | Mammographic<br>breast density                  | 14 | Inconclusive      |
| Chung M               | 2009 | 25OHD | general                                                                                     | Mortality                                       | 4  | No<br>association |
| Barnard K             | 2010 | 25OHD | older adults                                                                                | Mortality                                       | 6  | Inconclusive      |

**Supplementary Table D** General characteristics of the 74 meta-analyses of observational studies (RR: relative risk, OR: odds ratio, HR: hazard ratio, SMD: standardised mean difference, WMD: weighted mean difference, CI: confidence interval, CKD: chronic kidney disease)

| Author                 | Date | Vitamin D measurement | Population                 | Outcome                    | Unit of comparison         | Participants total | Events total | Type of metric | Meta-analysis model         | N of studies | Reported RR of meta-analysis (95% CI) |
|------------------------|------|-----------------------|----------------------------|----------------------------|----------------------------|--------------------|--------------|----------------|-----------------------------|--------------|---------------------------------------|
| <b>Cancer outcomes</b> |      |                       |                            |                            |                            |                    |              |                |                             |              |                                       |
| Gilbert R              | 2011 | 25OHD                 | men                        | Aggressive prostate cancer | per 10 ng/ml               | 6646               | 1460         | OR             | random                      | 6            | 0.98 (0.84, 1.15)                     |
| Gilbert R              | 2011 | 1,25(OH)2D            | men                        | Aggressive prostate cancer | per 10 ng/ml               | 1488               | 696          | OR             | random                      | 2            | 0.86 (0.72, 1.02)                     |
| Chen P                 | 2013 | 25OHD                 | general/<br>Hospital based | Breast cancer              | highest vs lowest quartile | 26317              | 11771        | OR             | random                      | 21           | 0.52 (0.40, 0.68)                     |
| Chung M                | 2011 | 25OHD                 | women                      | Breast cancer              | per 10 nmol/lt             | 4726               | 2363         | OR             | dose-response meta-analysis | 4            | 0.99 (0.97, 1.01)                     |
| Gandini S              | 2011 | 25OHD                 | adults                     | Breast cancer              | per 10 ng/ml               | 29770              | 6175         | RR             | random                      | 10           | 0.89 (0.81, 0.98)                     |
| Mohr SB                | 2011 | 25OHD                 | women                      | Breast cancer              | highest vs lowest quintile | 16337              | 7547         | Peto OR        | no info                     | 11           | 0.61 (0.47, 0.80)                     |
| Yin L                  | 2010 | 25OHD                 | general                    | Breast cancer              | 20 ng/ml                   | 12901              | 6147         | OR             | random                      | 9            | 0.73 (0.60, 0.88)                     |
| Chen P                 | 2010 | 25OHD                 | women                      | Breast cancer              | highest vs lowest quartile | 11330              | 5489         | OR             | random                      | 7            | 0.55 (0.38, 0.80)                     |
| Chen P                 | 2010 | 1,25(OH)2D            | women                      | Breast cancer              | highest vs lowest quartile | 3627               | 1802         | OR             | random                      | 3            | 0.99 (0.68, 1.44)                     |
| Lee JE                 | 2011 | 25OHD                 | adults                     | Colon cancer               | highest vs lowest category | 4578               | 1822         | OR             | random                      | 10           | 0.77 (0.56, 1.07)                     |

|           |      |            |                                                      |                               |                            |         |         |    |                             |   |                   |
|-----------|------|------------|------------------------------------------------------|-------------------------------|----------------------------|---------|---------|----|-----------------------------|---|-------------------|
| Lee JE    | 2011 | 1,25(OH)2D | adults                                               | Colon cancer                  | highest vs lowest category | 5284    | 2528    | OR | no info                     | 4 | 0.88 (0.57, 1.35) |
| Fedirko V | 2010 | 25OHD      | adults with no prior history of colorectal neoplasms | Colorectal adenoma            | highest vs lowest quartile | 1386    | 616     | OR | pooled meta-analysis        | 3 | 0.59 (0.41, 0.84) |
| Yin L     | 2011 | 25OHD      | general                                              | Colorectal adenoma            | per 20 ng/ml               | 7654    | 3539    | OR | random                      | 9 | 0.82 (0.69, 0.97) |
| Wei MY    | 2008 | 25OHD      | general                                              | Colorectal adenoma            | highest vs lowest quintile | 3787    | 2628    | OR | random                      | 7 | 0.7 (0.56, 0.87)  |
| Yin L     | 2011 | 25OHD      | Colorectal adenoma patients                          | Colorectal adenoma recurrence | per 20 ng/ml               | 2169    | 984     | OR | random                      | 3 | 0.84 (0.72, 0.97) |
| Ma Y      | 2011 | 25OHD      | adults                                               | Colorectal cancer             | highest vs lowest category | 6715    | 2767    | RR | random                      | 9 | 0.67 (0.54, 0.80) |
| Chung M   | 2011 | 25OHD      | adults                                               | Colorectal cancer             | per 10nmol/lt              | 2249    | 1127    | OR | dose-response meta-analysis | 9 | 0.94 (0.91, 0.97) |
| Gandini S | 2011 | 25OHD      | adults                                               | Colorectal cancer             | per 10 ng/ml               | no info | 2630    | RR | random                      | 9 | 0.85 (0.79, 0.91) |
| Gorham ED | 2007 | 25OHD      | adults                                               | Colorectal cancer             | <6 vs ≥37 ng/ml            | 1448    | 535     | OR | pooled meta-analysis        | 5 | 0.46 (0.32, 0.64) |
| Lee JE    | 2011 | 25OHD      | adults                                               | Colorectal cancer             | highest vs lowest category | 6628    | 2690    | OR | random                      | 9 | 0.66 (0.54, 0.81) |
| Lee JE    | 2011 | 1,25(OH)2D | adults                                               | Colorectal cancer             | highest vs lowest category | no info | no info | OR | no info                     | 4 | 1.01 (0.59, 1.73) |
| Touvier M | 2011 | 25OHD      | general                                              | Colorectal                    | per 100 IU/lt              | no info | 2375    | RR | random                      | 6 | 0.96 (0.94, 0.97) |





|                    |      |       |         |                                    |                                |         |         |    |        |    |                   |
|--------------------|------|-------|---------|------------------------------------|--------------------------------|---------|---------|----|--------|----|-------------------|
| Wang L             | 2012 | 25OHD | general | Cardiovascular disease             | highest vs lowest category     | 64994   | 6123    | RR | random | 19 | 1.52 (1.30, 1.77) |
| Grandi NC          | 2010 | 25OHD | adults  | Cardiovascular disease             | lowest vs highest category     | 5253    | 756     | HR | random | 4  | 1.54 (1.22, 1.95) |
| Sokol SI           | 2011 | 25OHD | general | Cardiovascular disease             | Hypovitaminosis D              | no info | no info | RR | random | 7  | 1.68 (1.23, 2.28) |
| Parker J           | 2010 | 25OHD | general | Cardiovascular disease (prevalent) | highest vs lowest category     | 64722   | 7600    | OR | random | 16 | 0.67 (0.55, 0.81) |
| Grandi NC          | 2010 | 25OHD | adults  | Cardiovascular disease mortality   | lowest vs highest category     | 24387   | 2007    | HR | random | 5  | 1.83 (1.19, 2.80) |
| Pittas AG          | 2010 | 25OHD | general | Hypertension                       | <37–51 nmol/l vs >75–81 nmol/l | 2553    | 1149    | RR | random | 3  | 1.76 (1.27, 2.44) |
| Burgaz A           | 2011 | 25OHD | adults  | Hypertension                       | highest vs lowest quartile     | 78028   | no info | OR | random | 18 | 0.73 (0.63, 0.84) |
| Kunutsor SK        | 2013 | 25OHD | general | Hypertension                       | highest vs lowest category     | 48633   | 4965    | RR | random | 7  | 0.70 (0.58, 0.86) |
| Brondum-Jacobsen P | 2012 | 25OHD | adults  | Ischemic heart disease             | lowest vs highest quartile     | 82982   | 8376    | HR | random | 18 | 1.39 (1.25, 1.54) |
| Brondum-Jacobsen P | 2013 | 25OHD | general | Ischemic stroke                    | lowest vs highest quartile     | 26596   | 1800    | HR | random | 5  | 1.52 (1.26, 1.84) |
| Brondum-Jacobsen P | 2013 | 25OHD | general | Ischemic stroke                    | lowest vs highest quartile     | 31788   | 844     | OR | random | 5  | 1.92 (1.64, 2.26) |
| Sun Q              | 2012 | 25OHD | general | Stroke                             | highest vs lowest category     | no info | 1214    | RR | fixed  | 6  | 1.52 (1.20, 1.85) |

|                            |      |                                      |                                   |                                |                            |       |      |         |        |    |                        |
|----------------------------|------|--------------------------------------|-----------------------------------|--------------------------------|----------------------------|-------|------|---------|--------|----|------------------------|
| Chowdhury R                | 2012 | 25OHD                                | adults                            | Stroke                         | highest vs lowest third    | 47809 | 926  | RR      | random | 7  | 0.60 (0.48, 0.72)      |
| <b>Cognitive disorders</b> |      |                                      |                                   |                                |                            |       |      |         |        |    |                        |
| Balion C                   | 2012 | 25OHD (one study measured 1,25(OH)D) | adults                            | Alzheimer's disease            | mean 25(OH)D               | 888   | n/a  | WMD     | random | 6  | -15.04 (-26.19, -3.89) |
| Annweiler C                | 2013 | 25OHD                                | general                           | Alzheimer's disease            | per SD                     | 1005  | 357  | SMD     | random | 10 | 1.40 (0.26, 2.54)      |
| Etgen T                    | 2012 | 25OHD                                | adults                            | Cognition                      | lowest vs highest quartile | 7688  | 1135 | OR      | random | 7  | 2.39 (1.91, 3.00)      |
| Anglin RE                  | 2013 | 25OHD                                | general (cross-sectional studies) | Depression                     | <50 vs >50 nmol/lit        | 22476 | 2051 | OR      | random | 9  | 1.13 (1.00, 1.71)      |
| Anglin RE                  | 2013 | 25OHD                                | general (cohort studies)          | Depression                     | <50 vs >50 nmol/lit        | 8815  | 617  | HR      | random | 3  | 2.21 (1.40, 3.49)      |
| <b>Infectious diseases</b> |      |                                      |                                   |                                |                            |       |      |         |        |    |                        |
| Nnoaham KE                 | 2008 | 25OHD                                | adults                            | Active tuberculosis            | mean                       | 534   | 308  | SMD     | random | 7  | 0.68 (0.43, 0.93)      |
| <b>Metabolic disorders</b> |      |                                      |                                   |                                |                            |       |      |         |        |    |                        |
| Saneei P                   | 2013 | 25OHD                                | general                           | Body mass index                | correlation coefficients   | 16525 | n/a  | Z score | random | 37 | -0.15 (-0.19, -0.11)   |
| Parker J                   | 2010 | 25OHD                                | general                           | Metabolic syndrome (prevalent) | highest vs lowest category | 31416 | 2821 | OR      | random | 8  | 0.49 (0.38, 0.64)      |
| Forouhi NG                 | 2012 | 25OHD                                | adults                            | Type 2 diabetes                | highest vs lowest quartile | 55713 | 3612 | RR      | random | 11 | 0.59 (0.52, 0.67)      |

|                                                             |      |       |                   |                                |                                  |       |            |     |        |    |                              |
|-------------------------------------------------------------|------|-------|-------------------|--------------------------------|----------------------------------|-------|------------|-----|--------|----|------------------------------|
| Mitri J                                                     | 2011 | 25OHD | adults            | Type 2 diabetes                | >25 vs<br><14 ng/ml              | 5664  | 1153       | RR  | random | 5  | 0.57 (0.43, 0.76)            |
| Afzal S                                                     | 2013 | 25OHD | general           | Type 2 diabetes                | lowest vs<br>highest<br>category | 72204 | 4877       | OR  | random | 16 | 1.50 (1.33, 1.68)            |
| Pittas AG                                                   | 2007 | 25OHD | general           | Type 2 diabetes<br>(prevalent) | 25–38 vs<br>10–23 ng/ml          |       |            | OR  | random | 4  | 0.36 (0.16, 0.80)            |
| Parker J                                                    | 2010 | 25OHD | general           | Type 2 diabetes<br>(prevalent) | highest vs<br>lowest<br>category | 11892 | 2424       | OR  | random | 9  | 0.45 (0.25, 0.82)            |
| <b>Neonatal/<br/>Infant/ Child<br/>related<br/>outcomes</b> |      |       |                   |                                |                                  |       |            |     |        |    |                              |
| Aghajafari F                                                | 2013 | 25OHD | pregnant<br>women | Birth length                   | mean (in cm)                     | 840   | n/a        | WMD | fixed  | 2  | -0.19 (-0.65,<br>0.26)       |
| Aghajafari F                                                | 2013 | 25OHD | pregnant<br>women | Birth weight                   | mean (in grams)                  | 5541  | n/a        | WMD | fixed  | 4  | -130.92 (-186.69,<br>-75.14) |
| Aghajafari F                                                | 2013 | 25OHD | pregnant<br>women | Head<br>circumference          | mean (in cm)                     | 840   | n/a        | WMD | fixed  | 2  | -0.05 (-0.34,<br>0.24)       |
| Aghajafari F                                                | 2013 | 25OHD | pregnant<br>women | Small for<br>gestational age   | lowest vs<br>highest<br>category | 6851  | no<br>info | OR  | fixed  | 6  | 1.85 (1.52, 2.26)            |
| <b>Pregnancy<br/>related<br/>outcomes</b>                   |      |       |                   |                                |                                  |       |            |     |        |    |                              |
| Poel YH                                                     | 2012 | 25OHD | pregnant<br>women | Gestational<br>diabetes        | <50 nmol/lt                      | 2146  | 433        | OR  | random | 7  | 1.61 (1.19, 2.17)            |
| Aghajafari F                                                | 2013 | 25OHD | pregnant<br>women | Gestational<br>diabetes        | lowest vs<br>highest<br>category | 4112  | 687        | OR  | fixed  | 10 | 1.49 (1.18, 1.89)            |
| Aghajafari F                                                | 2013 | 25OHD | pregnant<br>women | Preeclampsia                   | lowest vs<br>highest<br>category | 3230  | 393        | OR  | fixed  | 9  | 1.79 (1.25, 2.58)            |

|                          |      |       |                   |                                          |                            |       |       |                             |               |    |                      |
|--------------------------|------|-------|-------------------|------------------------------------------|----------------------------|-------|-------|-----------------------------|---------------|----|----------------------|
| <b>Skeletal outcomes</b> |      |       |                   |                                          |                            |       |       |                             |               |    |                      |
| Weatherall M             | 2000 | 25OHD | older individuals | Fractures                                | per SD                     | 2956  | 1572  | SMD                         |               |    | 0.66 (0.59, 0.74)    |
| Lai JK                   | 2010 | 25OHD | adults            | Hip fracture (hospital-based controls)   | geometric mean (in nmol/l) | 2201  | 1116  | log ratio of geometric mean | random        | 8  | -0.26 (-0.33, -0.23) |
| Lai JK                   | 2010 | 25OHD | adults            | Hip fracture (population-based controls) | geometric mean (in nmol/l) | 1655  | 818   | log ratio of geometric mean | random        | 9  | -0.51 (-0.64, -0.38) |
| <b>Other outcomes</b>    |      |       |                   |                                          |                            |       |       |                             |               |    |                      |
| Pilz S                   | 2011 | 25OHD | CKD patients      | Mortality                                | per 10 ng/mL               | 6853  | 2110  | RR                          | mixed effects | 10 | 0.86 (0.82, 0.91)    |
| Brondum-Jacobsen P       | 2012 | 25OHD | adults            | Mortality                                | lowest vs highest quartile | 77155 | 15447 | HR                          | random        | 17 | 1.46 (1.31, 1.64)    |

**Supplementary Table E** General characteristics of the 87 meta-analyses of RCTs of vitamin D supplementation (RR: relative risk, OR: odds ratio, RaR: rate ratio, SMD: standardised mean difference, WMD: weighted mean difference, CI: confidence interval)

| Author                         | Date | Compound                                                           | Versus                      | Population                               | Outcome                          | Participants total | Events total | Type of metric | Meta-analysis model | N of studies | Reported RR (95% CI) |
|--------------------------------|------|--------------------------------------------------------------------|-----------------------------|------------------------------------------|----------------------------------|--------------------|--------------|----------------|---------------------|--------------|----------------------|
| <b>Cardiovascular outcomes</b> |      |                                                                    |                             |                                          |                                  |                    |              |                |                     |              |                      |
| Wang L                         | 2010 | vitamin D                                                          | placebo                     | general                                  | Cardiovascular disease           | 2988               | 991          | RR             | fixed               | 2            | 0.90 (0.77, 1.05)    |
| Myung SK                       | 2013 | vitamin D                                                          | placebo                     | general                                  | Cardiovascular disease           | no info            | no info      | RR             | fixed               | 2            | 0.95 (0.86, 1.05)    |
| Pittas AG                      | 2010 | vitamin D2 and vitamin D3                                          | placebo                     | general                                  | Diastolic blood pressure (mm Hg) | no info            | n/a          | WMD            | no info             | no info      | -0.43 (-1.39, 0.53)  |
| Witham MD                      | 2009 | Alphacalcidol or vitamin D3 or UVA + UVB (or vitamin D3 + calcium) | placebo or UVA (or calcium) | hypertensive individuals                 | Diastolic blood pressure (mm Hg) | 545                | n/a          | WMD            | random              | 8            | -3.05 (-5.50, -0.60) |
| Wu SH                          | 2010 | vitamin D                                                          | placebo                     | normotensive or hypertensive individuals | Diastolic blood pressure (mm Hg) | 366                | n/a          | WMD            | no info             | 3            | -0.03 (-1.98, 1.92)  |
| Pittas AG                      | 2010 | vitamin D2 and vitamin D3                                          | placebo                     | general                                  | Systolic blood pressure (mm Hg)  | no info            | n/a          | WMD            | no info             | no info      | -2.60 (-6.60, 1.09)  |
| Witham MD                      | 2009 | Alphacalcidol or vitamin D3 or UVA + UVB (or vitamin D3 + calcium) | placebo or UVA (or calcium) | hypertensive individuals                 | Systolic blood pressure (mm Hg)  | 545                | n/a          | WMD            | random              | 8            | -3.63 (-8.00, 0.74)  |
| Wu SH                          | 2010 | vitamin D                                                          | placebo                     | normotensive or hypertensive individuals | Systolic blood pressure (mm Hg)  | 366                | n/a          | WMD            | no info             | 3            | -2.39 (-5.70, 0.90)  |

|                                                 |      |                                                             |                         |                                                   |                           |         |     |     |         |         |                     |
|-------------------------------------------------|------|-------------------------------------------------------------|-------------------------|---------------------------------------------------|---------------------------|---------|-----|-----|---------|---------|---------------------|
| <b>Metabolic outcomes</b>                       |      |                                                             |                         |                                                   |                           |         |     |     |         |         |                     |
| George PS                                       | 2012 | vitamin D or analogues                                      | placebo                 | diabetes patients with normal glucose tolerance   | Fasting glucose (nmol/l)  | no info | n/a | WMD | no info | no info | 0.01 (-0.21, 0.23)  |
| George PS                                       | 2012 | vitamin D or analogues                                      | placebo                 | diabetes patients with abnormal glucose tolerance | Fasting glucose (nmol/l)  | no info | n/a | WMD | no info | no info | -0.30 (-0.90, 0.30) |
| Wang H                                          | 2012 | vitamin D (or vitamin D + calcium)                          | placebo (or calcium)    | general                                           | HDL (mg/dl)               | 1194    | n/a | WMD | fixed   | 8       | -0.14 (-0.99, 0.71) |
| George PS                                       | 2012 | vitamin D or analogues                                      | placebo                 | diabetes patients                                 | Insulin resistance        | no info | n/a | SMD | no info | 5       | 0.16 (-0.11, 0.42)  |
| Wang H                                          | 2012 | vitamin D (or vitamin D + calcium)                          | placebo (or calcium)    | general                                           | Total cholesterol (mg/dl) | 1314    | n/a | WMD | fixed   | 11      | 1.52 (-1.42, 4.46)  |
| Wang H                                          | 2012 | vitamin D (or vitamin D + calcium)                          | placebo (or calcium)    | general                                           | LDL (mg/dl)               | 1129    | n/a | WMD | fixed   | 7       | 3.23 (0.55, 5.90)   |
| Wang H                                          | 2012 | vitamin D (or vitamin D + calcium)                          | placebo (or calcium)    | general                                           | Triglycerides (mg/dl)     | 1194    | n/a | WMD | fixed   | 8       | -1.92 (-7.72, 3.88) |
| <b>Neonatal/ infant/ child related outcomes</b> |      |                                                             |                         |                                                   |                           |         |     |     |         |         |                     |
| De-Regil LM                                     | 2012 | vitamin D alone or in combination with other micronutrients | placebo or no treatment | pregnant women                                    | Birth length (cm)         | 326     | n/a | WMD | random  | 2       | 0.97 (-0.41, 2.34)  |

|                                   |      |                                                             |                          |                |                                            |      |         |     |        |    |                         |
|-----------------------------------|------|-------------------------------------------------------------|--------------------------|----------------|--------------------------------------------|------|---------|-----|--------|----|-------------------------|
| De-Regil LM                       | 2012 | vitamin D alone or in combination with other micronutrients | placebo or no treatment  | pregnant women | Birth weight (grams)                       | 403  | n/a     | WMD | random | 3  | 39.55 (-240.68, 319.78) |
| De-Regil LM                       | 2012 | vitamin D alone or in combination with other micronutrients | placebo or no treatment  | pregnant women | Low birth weight                           | 463  | no info | RR  | random | 3  | 0.48 (0.23, 1.01)       |
| Thorne-Lyman A                    | 2012 | vitamin D                                                   | placebo                  | pregnant women | Low birth weight                           | 507  | 55      | RR  | fixed  | 3  | 0.40 (0.23, 0.71)       |
| Hujoel PP                         | 2013 | vitamin D2 or vitamin D3 or UV therapy                      | no supplement or placebo | children       | Dental caries                              | 1513 | no info | RR  | random | 38 | 0.53 (0.43, 0.65)       |
| De-Regil LM                       | 2012 | vitamin D alone or in combination with other micronutrients | placebo or no treatment  | pregnant women | Head circumference at birth (cm)           | 326  | n/a     | WMD | random | 2  | 0.43 (0.06, 0.79)       |
| Thorne-Lyman A                    | 2012 | vitamin D                                                   | placebo                  | pregnant women | Small-for-gestational age                  | 305  | 55      | RR  | fixed  | 2  | 0.67 (0.40, 1.11)       |
| <b>Pregnancy related outcomes</b> |      |                                                             |                          |                |                                            |      |         |     |        |    |                         |
| De-Regil LM                       | 2012 | vitamin D alone or in combination with other micronutrients | placebo or no treatment  | pregnant women | Maternal vitamin D levels at term (nmol/l) | 414  | n/a     | WMD | random | 4  | 47.08 (23.76, 70.39)    |
| Thorne-Lyman A                    | 2012 | vitamin D                                                   | placebo                  | pregnant women | Mean gestational age at delivery (weeks)   | 529  | n/a     | WMD | fixed  | 2  | 0.17 (-0.16, 0.51)      |

|                          |      |                                             |         |                           |                                                 |         |     |     |        |   |                     |
|--------------------------|------|---------------------------------------------|---------|---------------------------|-------------------------------------------------|---------|-----|-----|--------|---|---------------------|
| Thorne-Lyman A           | 2012 | vitamin D                                   | placebo | pregnant women            | Preterm delivery                                | 529     | 28  | RR  | fixed  | 2 | 0.77 (0.35, 1.66)   |
| <b>Skeletal outcomes</b> |      |                                             |         |                           |                                                 |         |     |     |        |   |                     |
| Winzenberg T             | 2011 | vitamin D3                                  | placebo | healthy children          | Bone mineral density (% change)                 | 672     | n/a | SMD | fixed  | 5 | 0.10 (-0.06, 0.26)  |
| Reid IR                  | 2013 | vitamin D2 or D3 (no vitamin D metabolites) | placebo | community-dwelling adults | Bone mineral density (% change)                 | no info | n/a | WMD | random | 3 | -0.90 (-2.10, 0.40) |
| Reid IR                  | 2013 | vitamin D2 or D3 (no vitamin D metabolites) | placebo | community-dwelling adults | Bone mineral density in femoral neck (% change) | no info | n/a | WMD | random | 8 | 1.10 (0.40, 1.90)   |
| Reid IR                  | 2013 | vitamin D2 or D3 (no vitamin D metabolites) | placebo | community-dwelling adults | Bone mineral density in forearm (% change)      | no info | n/a | WMD | random | 2 | -0.70 (-1.70, 0.40) |
| Winzenberg T             | 2011 | vitamin D3                                  | placebo | healthy children          | Bone mineral density in forearm (% change)      | 563     | n/a | SMD | random | 3 | 0.04 (-0.36, 0.45)  |
| Winzenberg T             | 2011 | vitamin D3                                  | placebo | healthy children          | Bone mineral density in hip (% change)          | 639     | n/a | SMD | random | 4 | 0.06 (-0.18, 0.29)  |
| Reid IR                  | 2013 | vitamin D2 or D3 (no vitamin D metabolites) | placebo | community-dwelling adults | Bone mineral density in hip (% change)          | no info | n/a | WMD | random | 6 | 0.70 (-0.10, 1.60)  |
| Winzenberg T             | 2011 | vitamin D3                                  | placebo | healthy children          | Bone mineral density in lumbar spine (% change) | 660     | n/a | SMD | fixed  | 5 | 0.15 (-0.01, 0.31)  |
| Reid IR                  | 2013 | vitamin D2 or D3 (no vitamin D metabolites) | placebo | community-dwelling adults | Bone mineral density in lumbar spine (% change) | no info | n/a | WMD | random | 7 | 0.10 (-0.60, 0.70)  |



|                     |      |                                                                                              |                       |                                                   |           |         |         |    |         |    |                   |
|---------------------|------|----------------------------------------------------------------------------------------------|-----------------------|---------------------------------------------------|-----------|---------|---------|----|---------|----|-------------------|
| Palmer SC           | 2009 | established and newer vitamin D compounds                                                    | placebo, no treatment | chronic kidney disease requiring dialysis         | Bone pain | 109     | no info | RR | fixed   | 4  | 0.29 (0.03, 2.63) |
| Bischoff-Ferrari HA | 2009 | vitamin D3 or vitamin D2 (or vitamin D3 or vitamin D2 + calcium)                             | placebo (or calcium)  | older adults                                      | Falls     | 1476    | no info | RR | no info | 6  | 0.77 (0.65, 0.92) |
| Bischoff-Ferrari HA | 2009 | Active form of vitamin D                                                                     | placebo               | older adults                                      | Falls     | 624     | 223     | RR | no info | 2  | 0.78 (0.64, 0.94) |
| Bischoff-Ferrari HA | 2004 | vitamin D or active vitamin D analogue (or vitamin D or active vitamin D analogue + calcium) | placebo (or calcium)  | older adults                                      | Falls     | 1237    | no info | RR |         | 5  | 0.69 (0.53, 0.88) |
| Kalyani RR          | 2010 | vitamin D                                                                                    | placebo               | older adults                                      | Falls     | 9508    | no info | RR | random  | 7  | 1.01 (0.96, 1.07) |
| Murad MH            | 2011 | vitamin D2 and vitamin D3                                                                    | placebo               | older adults                                      | Falls     | no info | no info | OR | random  | 10 | 0.97 (0.84, 1.11) |
| Murad MH            | 2011 | vitamin D2 and vitamin D3 + calcium                                                          | calcium               | older adults                                      | Falls     | no info | no info | OR | random  | 6  | 0.63 (0.50, 0.81) |
| Cameron ID          | 2012 | vitamin D3 or D2 plus calcium                                                                | calcium               | older individuals in care facilities or hospitals | Falls     | 747     | no info | RR | random  | 2  | 0.85 (0.69, 1.05) |
| Cameron ID          | 2012 | vitamin D2                                                                                   | usual care or placebo | older individuals in care facilities or hospitals | Falls     | 3765    | no info | RR | random  | 2  | 0.80 (0.38, 1.71) |
| Gillespie LD        | 2012 | vitamin D3                                                                                   | placebo or control    | older people in the community                     | Falls     | 4516    | no info | RR | random  | 3  | 1.08 (0.93, 1.26) |

|              |      |                                           |                                    |                                                    |                      |       |         |     |        |    |                    |
|--------------|------|-------------------------------------------|------------------------------------|----------------------------------------------------|----------------------|-------|---------|-----|--------|----|--------------------|
| Gillespie LD | 2012 | vitamin D3 + calcium                      | calcium                            | older people in the community                      | Falls                | 379   | no info | RR  | random | 2  | 0.70 (0.53, 0.92)  |
| Gillespie LD | 2012 | vitamin D2                                | placebo or control                 | older people in the community                      | Falls                | 9563  | no info | RR  | random | 2  | 0.98 (0.92, 1.04)  |
| Cameron ID   | 2012 | vitamin D3 or D2 plus calcium             | calcium                            | older individuals in care facilities or hospitals  | Falls: Rate of falls | 747   | no info | RaR | random | 2  | 0.71 (0.56, 0.90)  |
| Cameron ID   | 2012 | vitamin D2                                | usual care or placebo              | older individuals in care facilities or hospitals  | Falls: Rate of falls | 3765  | no info | RaR | random | 2  | 0.55 (0.19, 1.64)  |
| Gillespie LD | 2012 | vitamin D3                                | placebo or control                 | older people in the community                      | Falls: Rate of falls | 2478  | no info | RaR | random | 2  | 1.14 (1.03, 1.27)  |
| Avenell A    | 2009 | Vitamin D2, D3 or 25OHD                   | placebo or no intervention         | Men over 65 years of age and post-menopausal women | Fractures            | 25016 | 2195    | RR  | fixed  | 10 | 1.01 (0.93, 1.09)  |
| Chung M      | 2011 | vitamin D                                 | placebo                            | community dwelling or institutionalised adults     | Fractures            | 14583 | 1235    | RR  | random | 5  | 1.03 (0.84, 1.26)  |
| DIPART group | 2010 | vitamin D2 or D3                          | placebo or leaflet or no treatment | general                                            | Fractures            | 19316 | no info | HR  | fixed  | 4  | 1.01 (0.92, 1.12)  |
| Gillespie LD | 2012 | vitamin D3                                | placebo or control                 | older people in the community                      | Fractures            | 4942  | no info | RR  | random | 2  | 0.97 (0.63, 1.51)  |
| Gillespie LD | 2012 | vitamin D3 + calcium                      | calcium                            | older people in the community                      | Fractures            | 379   | no info | RR  | random | 2  | 0.54 (0.26, 1.15)  |
| Palmer SC    | 2009 | established and newer vitamin D compounds | placebo, no treatment              | chronic kidney disease requiring dialysis          | Fractures            | 181   | no info | RR  | fixed  | 4  | 1.00 (0.06, 15.41) |

|                     |      |                                                                                                       |                                      |                                                    |                                   |         |         |    |        |   |                   |
|---------------------|------|-------------------------------------------------------------------------------------------------------|--------------------------------------|----------------------------------------------------|-----------------------------------|---------|---------|----|--------|---|-------------------|
| Avenell A           | 2009 | Vitamin D2, D3 or 25OHD                                                                               | placebo or no intervention           | Men over 65 years of age and post-menopausal women | Fractures: hip                    | 24749   | 695     | RR | fixed  | 9 | 1.15 (0.99, 1.33) |
| Bergman GJ          | 2010 | vitamin D3 (with calcium)                                                                             | calcium                              | older women                                        | Fractures: hip                    | no info | no info | OR | random | 2 | 1.12 (0.23, 3.04) |
| DIPART group        | 2010 | vitamin D2 or D3                                                                                      | placebo or leaflet or no treatment   | general                                            | Fractures: hip                    | 19316   | no info | HR | fixed  | 4 | 1.09 (0.92, 1.29) |
| Lai JK              | 2010 | vitamin D2 or D3 (or vitamin D2 or D3 and calcium)                                                    | placebo or no treatment (or calcium) | older adults                                       | Fractures: hip                    | 28324   | 801     | RR | ?      | 8 | 1.13 (0.98, 1.29) |
| Bergman GJ          | 2010 | vitamin D3 (with calcium)                                                                             | calcium                              | older women                                        | Fractures: Non-vertebral          | no info | no info | OR | random | 2 | 0.73 (0.17, 1.90) |
| Bischoff-Ferrari HA | 2009 | vitamin D3 or vitamin D2 or active vitamin D (vitamin D3 or vitamin D2 or active vitamin D + calcium) | placebo (or calcium)                 | people >65                                         | Fractures: Non-vertebral          | 7130    | 610     | RR |        | 5 | 0.79 (0.63, 0.99) |
| Bergman GJ          | 2010 | vitamin D3 (with calcium)                                                                             | calcium                              | older women                                        | Fractures: Non-vertebral-non-hip  | no info | no info | OR | random | 2 | 0.69 (0.21, 1.66) |
| Avenell A           | 2009 | Vitamin D2, D3 or 25OHD                                                                               | placebo or no intervention           | Men over 65 years of age and post-menopausal women | Fractures: vertebral or deformity | 9138    | 95      | RR | random | 5 | 0.90 (0.42, 1.92) |

|                       |      |                                                                    |                         |                                               |                                                |      |      |     |        |   |                        |
|-----------------------|------|--------------------------------------------------------------------|-------------------------|-----------------------------------------------|------------------------------------------------|------|------|-----|--------|---|------------------------|
| Muir SW               | 2011 | vitamin D2 and vitamin D3 (or vitamin D2 and vitamin D3 + calcium) | placebo (or calcium)    | older adults                                  | Performance measures: Balance sway             | 207  | n/a  | SMD | fixed  | 3 | -0.20 (-0.39, -0.01)   |
| Muir SW               | 2011 | vitamin D2 and vitamin D3 (or vitamin D2 and vitamin D3 + calcium) | placebo (or calcium)    | older adults                                  | Performance measures: Lower extremity strength | 314  | n/a  | SMD | fixed  | 3 | 0.05 (-0.11, 0.20)     |
| Muir SW               | 2011 | vitamin D2 and vitamin D3 (or vitamin D2 and vitamin D3 + calcium) | placebo (or calcium)    | older adults                                  | Performance measures: Muscle strength          | 274  | n/a  | SMD | fixed  | 3 | -0.19 (-0.35, -0.02)   |
| <b>Other outcomes</b> |      |                                                                    |                         |                                               |                                                |      |      |     |        |   |                        |
| Palmer SC             | 2009 | established and newer vitamin D compounds                          | placebo, no treatment   | chronic kidney disease not requiring dialysis | Alkaline phosphatase (U/lt)                    | 111  | n/a  | WMD | fixed  | 2 | -21.81 (-40.39, 3.22)  |
| Palmer SC             | 2009 | established and newer vitamin D compounds                          | placebo, no treatment   | chronic kidney disease requiring dialysis     | Alkaline phosphatase (U/lt)                    | 135  | n/a  | WMD | fixed  | 3 | -27.35 (-50.69, -4.01) |
| Palmer SC             | 2009 | established and newer vitamin D compounds                          | placebo, no treatment   | chronic kidney disease not requiring dialysis | Creatinine clearance (ml/min)                  | 38   | n/a  | WMD | fixed  | 4 | -1.68 (-6.92, 3.56)    |
| Autier P              | 2007 | vitamin D                                                          | placebo or no vitamin D | general                                       | Mortality                                      | 7276 | 1452 | RR  | random | 5 | 0.91 (0.78, 1.06)      |

|              |      |                                           |                            |                                               |                               |       |         |     |                               |    |                           |
|--------------|------|-------------------------------------------|----------------------------|-----------------------------------------------|-------------------------------|-------|---------|-----|-------------------------------|----|---------------------------|
| Bjelakovic G | 2011 | vitamin D3                                | placebo or no intervention | general                                       | Mortality                     | 12824 | 1703    | RR  | random                        | 9  | 0.91 (0.82, 1.02)         |
| Bjelakovic G | 2011 | vitamin D2                                | placebo or no intervention | general                                       | Mortality                     | 17079 | 2850    | RR  | random                        | 8  | 1.04 (0.97, 1.11)         |
| Elamin MB    | 2011 | vitamin D                                 | placebo or no treatment    | general                                       | Mortality                     | 13277 | 1865    | RR  | random                        | 10 | 0.97 (0.90, 1.04)         |
| Palmer SC    | 2009 | established and newer vitamin D compounds | placebo, no treatment      | chronic kidney disease not requiring dialysis | Mortality                     | 477   | no info | RR  | fixed                         | 4  | 1.40 (0.38, 5.15)         |
| Palmer SC    | 2009 | established and newer vitamin D compounds | placebo, no treatment      | chronic kidney disease requiring dialysis     | Mortality                     | 233   | no info | RR  | fixed                         | 5  | 1.34 (0.34, 5.24)         |
| Rejnmark L   | 2012 | vitamin D                                 | placebo                    | older adults                                  | Mortality                     | 15515 | 1653    | HR  | participati on level analysis | 4  | 0.96 (0.87, 1.06)         |
| Palmer SC    | 2009 | established and newer vitamin D compounds | placebo, no treatment      | chronic kidney disease not requiring dialysis | Parathyroid hormone (nmol/lt) | 153   | n/a     | WMD | fixed                         | 4  | -49.34 (-85.7, -12.97)    |
| Palmer SC    | 2009 | established and newer vitamin D compounds | placebo, no treatment      | chronic kidney disease requiring dialysis     | Parathyroid hormone (nmol/lt) | 212   | n/a     | WMD | fixed                         | 6  | -196.05 (-298.43, -93.66) |
| Kandula P    | 2011 | vitamin D (no active compounds)           | placebo                    | chronic kidney disease patients               | Parathyroid hormone (nmol/lt) | 177   | n/a     | WMD | random                        | 4  | -31.53 (-57.01, -6.05)    |
| Palmer SC    | 2009 | established and newer vitamin D compounds | placebo, no treatment      | chronic kidney disease requiring dialysis     | Parathyroidectomy             | 133   | no info | RR  | fixed                         | 2  | 0.82 (0.05, 12.47)        |

|           |      |                                           |                       |                                               |                             |     |         |    |       |   |                    |
|-----------|------|-------------------------------------------|-----------------------|-----------------------------------------------|-----------------------------|-----|---------|----|-------|---|--------------------|
| Palmer SC | 2009 | established and newer vitamin D compounds | placebo, no treatment | chronic kidney disease not requiring dialysis | Risk of hypercalcaemia      | 612 | no info | RR | fixed | 7 | 3.04 (1.17, 7.90)  |
| Palmer SC | 2009 | established and newer vitamin D compounds | placebo, no treatment | chronic kidney disease requiring dialysis     | Risk of hypercalcaemia      | 182 | no info | RR | fixed | 5 | 3.80 (0.90, 16.12) |
| Palmer SC | 2009 | established and newer vitamin D compounds | placebo, no treatment | chronic kidney disease not requiring dialysis | Risk of hyperphosphat aemia | 245 | no info | RR | fixed | 2 | 1.58 (0.47, 5.30)  |
| Palmer SC | 2009 | established and newer vitamin D compounds | placebo, no treatment | chronic kidney disease requiring dialysis     | Risk of hyperphosphat aemia | 59  | no info | RR | fixed | 2 | 1.57 (0.97, 2.54)  |
| Palmer SC | 2009 | established and newer vitamin D compounds | placebo, no treatment | chronic kidney disease not requiring dialysis | Risk of requiring dialysis  | 301 | no info | RR | fixed | 4 | 0.76 (0.36, 1.62)  |
| Palmer SC | 2009 | established and newer vitamin D compounds | placebo, no treatment | chronic kidney disease requiring dialysis     | Subperiosteal erosions      | 120 | no info | RR | fixed | 3 | 0.41 (0.07, 2.38)  |
| Palmer SC | 2009 | established and newer vitamin D compounds | placebo, no treatment | chronic kidney disease requiring dialysis     | Vascular calcification      | 103 | no info | RR | fixed | 2 | 1.09 (0.45, 2.67)  |

**Supplementary Table F** General characteristics of 76 non overlapping systematic reviews of observational studies

| Author                     | Year | Biomarker  | Population                                             | Outcome                                                  | N of studies | Main findings  |
|----------------------------|------|------------|--------------------------------------------------------|----------------------------------------------------------|--------------|----------------|
| <b>Autoimmune diseases</b> |      |            |                                                        |                                                          |              |                |
| Kriegel MA                 | 2011 | 25OHD      | general                                                | Ankylosing spondylitis                                   | 8            | Suggestive     |
| Kriegel MA                 | 2011 | 25OHD      | general                                                | Crohn's disease                                          | 4            | Suggestive     |
| Antico A                   | 2012 | 25OHD      | general                                                | Multiple Sclerosis                                       | 11           | Suggestive     |
| Cao Y                      | 2013 | 25OHD      | general                                                | Osteoarthritis                                           | 13           | Suggestive     |
| Antico A                   | 2012 | 25OHD      | general                                                | Rheumatoid arthritis                                     | 7            | Inconclusive   |
| Song GG                    | 2012 | 25OHD      | Rheumatoid arthritis patients                          | Rheumatoid arthritis activity                            | 8            | Definite       |
| Antico A                   | 2012 | 25OHD      | general                                                | Scleroderma                                              | 7            | Inconclusive   |
| Sakthiswary R              | 2013 | 25OHD      | general                                                | Systemic lupus erythematosus                             | 22           | Suggestive     |
| Kriegel MA                 | 2011 | 25OHD      | general                                                | Thyroid autoimmunity                                     | 1            | Inconclusive   |
| Antico A                   | 2012 | 25OHD      | general                                                | Type 1 diabetes                                          | 10           | Suggestive     |
| Christesen HT              | 2012 | 25OHD      | impact of maternal vitamin D status on children health | Type 1 diabetes in childhood (maternal vitamin D status) | 5            | Inconclusive   |
| Kriegel MA                 | 2011 | 25OHD      | general                                                | Vitiligo                                                 | 1            | Inconclusive   |
| <b>Cancer outcomes</b>     |      |            |                                                        |                                                          |              |                |
| van der Rhee H             | 2009 | 25OHD      | general                                                | Breast cancer                                            | 9            | Inconclusive   |
| Buttigliero C              | 2011 | 25OHD      | cancer patients                                        | Breast cancer prognosis                                  | 2            | Inconclusive   |
| Chung M                    | 2009 | 25OHD      | general                                                | Cancer mortality                                         | 1            | No association |
| Chung M                    | 2009 | 25OHD      | general                                                | Colorectal adenoma                                       | 1            | No association |
| Chung M                    | 2009 | 1,25(OH)2D | general                                                | Colorectal cancer                                        | 3            | No association |
| van der Rhee H             | 2009 | 25OHD      | general                                                | Colorectal cancer                                        | 8            | Definite       |
| Buttigliero C              | 2011 | 25OHD      | cancer patients                                        | Colorectal cancer prognosis                              | 2            | Inconclusive   |
| van der Rhee H             | 2009 | 25OHD      | general                                                | Lung cancer                                              | 4            | Inconclusive   |
| Buttigliero C              | 2011 | 25OHD      | cancer patients                                        | Melanoma prognosis                                       | 1            | Inconclusive   |
| Kelly LJ                   | 2009 | 25OHD      | general                                                | Non-Hodgkin Lymphoma                                     | 8            | Inconclusive   |
| Buttigliero C              | 2011 | 25OHD      | cancer patients                                        | Non-small cell lung cancer prognosis                     | 2            | Inconclusive   |
| van der Rhee H             | 2009 | 25OHD      | general                                                | Oesophageal cancer                                       | 3            | Inconclusive   |
| Cook LS                    | 2010 | 25OHD      | General women)                                         | Ovarian cancer                                           | 1            | Inconclusive   |
| van der Rhee H             | 2009 | 25OHD      | general                                                | Pancreatic cancer                                        | 3            | Inconclusive   |
| Chung M                    | 2009 | 1,25(OH)2D | general                                                | Prostate cancer                                          | 5            | Inconclusive   |

|                                |      |       |                                                        |                                                     |    |                |
|--------------------------------|------|-------|--------------------------------------------------------|-----------------------------------------------------|----|----------------|
| van der Rhee H                 | 2009 | 25OHD | general                                                | Prostate cancer                                     | 17 | Inconclusive   |
| Buttigliero C                  | 2011 | 25OHD | cancer patients                                        | Prostate cancer prognosis                           | 1  | Inconclusive   |
| van der Rhee H                 | 2009 | 25OHD | general                                                | Renal cancer                                        | 1  | Inconclusive   |
| van der Rhee H                 | 2009 | 25OHD | general                                                | Stomach cancer                                      | 1  | Inconclusive   |
| Pittas AG                      | 2010 | 25OHD | general                                                | Cardiovascular disease                              | 7  | Suggestive     |
| Renzaho AM                     | 2011 | 25OHD | ethnic minorities                                      | Cardiovascular disease in ethnic minorities         | 5  | Suggestive     |
| Barnard K                      | 2010 | 25OHD | older adults                                           | Cardiovascular disease mortality                    | 6  | Inconclusive   |
| Barnard K                      | 2010 | 25OHD | older adults                                           | Hypertension                                        | 5  | Inconclusive   |
| <b>Cardiovascular outcomes</b> |      |       |                                                        |                                                     |    |                |
| Dolinsky DH                    | 2013 | 25OHD | children                                               | Hypertension in children                            | 14 | Definite       |
| Chung M                        | 2009 | 25OHD | general                                                | Myocardial infarction                               | 1  | No association |
| Chung M                        | 2009 | 25OHD | general                                                | Stroke                                              | 1  | No association |
| <b>Cognitive disorders</b>     |      |       |                                                        |                                                     |    |                |
| Barnard K                      | 2010 | 25OHD | older adults                                           | Cognition                                           | 5  | Inconclusive   |
| Barnard K                      | 2010 | 25OHD | older adults                                           | Depression                                          | 4  | Inconclusive   |
| <b>Infectious diseases</b>     |      |       |                                                        |                                                     |    |                |
| Jolliffe DA                    | 2013 | 25OHD | general                                                | Acute respiratory infection                         | 25 | Suggestive     |
| Chung M                        | 2009 | 25OHD | general                                                | Infectious diseases mortality                       | 1  | Inconclusive   |
| <b>Metabolic disorders</b>     |      |       |                                                        |                                                     |    |                |
| Christesen HT                  | 2012 | 25OHD | impact of maternal vitamin D status on children health | Adiposity in children (maternal vitamin D status)   | 1  | No association |
| Renzaho AM                     | 2011 | 25OHD | ethnic minorities                                      | Metabolic syndrome in ethnic minorities             | 2  | Inconclusive   |
| Dolinsky DH                    | 2013 | 25OHD | children                                               | Metabolites: HDL in children                        | 22 | No association |
| Dolinsky DH                    | 2013 | 25OHD | children                                               | Metabolites: insulin/glucose metabolism in children | 18 | Inconclusive   |
| Dolinsky DH                    | 2013 | 25OHD | children                                               | Metabolites: LDL in children                        | 16 | No association |
| Dolinsky DH                    | 2013 | 25OHD | children                                               | Metabolites: triglycerides in children              | 21 | No association |
| Renzaho AM                     | 2011 | 25OHD | ethnic minorities                                      | Obesity in ethnic minorities                        | 14 | Suggestive     |
| Pittas AG                      | 2010 | 25OHD | general                                                | Type 2 diabetes                                     | 3  | Inconclusive   |



|                                                                 |      |       |                                                        |                                                                            |    |                |
|-----------------------------------------------------------------|------|-------|--------------------------------------------------------|----------------------------------------------------------------------------|----|----------------|
| Renzaho AM                                                      | 2011 | 25OHD | ethnic minorities                                      | Type 2 diabetes in ethnic minorities                                       | 5  | Suggestive     |
| <b>Neonatal/<br/>infant/<br/>child<br/>related<br/>outcomes</b> |      |       |                                                        |                                                                            |    |                |
| Christesen HT                                                   | 2012 | 25OHD | impact of maternal vitamin D status on children health | Allergic rhinitis and atopic dermatitis/eczema (maternal vitamin D status) | 5  | Inconclusive   |
| Christesen HT                                                   | 2012 | 25OHD | impact of maternal vitamin D status on children health | Birth weight (maternal vitamin D status)                                   | 11 | Inconclusive   |
| Christesen HT                                                   | 2012 | 25OHD | impact of maternal vitamin D status on children health | Cerebral function and diseases (maternal vitamin D status)                 | 2  | Inconclusive   |
| Christesen HT                                                   | 2012 | 25OHD | impact of maternal vitamin D status on children health | Childhood infections (maternal vitamin D status)                           | 5  | Inconclusive   |
| Thorne-Lyman A                                                  | 2012 | 25OHD | pregnant women                                         | Neonatal and infant growth                                                 | 3  | Suggestive     |
| Thorne-Lyman A                                                  | 2012 | 25OHD | pregnant women                                         | Small for gestational age (maternal vitamin D status)                      | 4  | Inconclusive   |
| Christesen HT                                                   | 2012 | 25OHD | impact of maternal vitamin D status on children health | Wheezing and asthma in childhood (maternal vitamin D status)               | 7  | Inconclusive   |
| <b>Pregnancy related outcomes</b>                               |      |       |                                                        |                                                                            |    |                |
| Aghajafari F                                                    | 2013 | 25OHD | pregnant women                                         | Bacterial vaginosis in pregnant women                                      | 3  | Definite       |
| Aghajafari F                                                    | 2013 | 25OHD | pregnant women                                         | Caesarean section                                                          | 2  | No association |
| Christesen HT                                                   | 2012 | 25OHD | pregnant women                                         | Fertility                                                                  | 2  | Inconclusive   |
| Christesen HT                                                   | 2012 | 25OHD | pregnant women                                         | Gestational diabetes mellitus                                              | 7  | Suggestive     |
| Christesen HT                                                   | 2012 | 25OHD | pregnant women                                         | Length of gestation/preterm birth                                          | 9  | Suggestive     |
| Christesen HT                                                   | 2012 | 25OHD | pregnant women                                         | Postpartum depression                                                      | 1  | Inconclusive   |
| Christesen HT                                                   | 2012 | 25OHD | pregnant women                                         | Preeclampsia in pregnant women                                             | 10 | Suggestive     |

|                          |      |       |                                                                           |                                                  |    |              |
|--------------------------|------|-------|---------------------------------------------------------------------------|--------------------------------------------------|----|--------------|
| Christesen HT            | 2012 | 25OHD | pregnant women                                                            | Pregnancy-associated breast cancer               | 1  | Inconclusive |
| <b>Skeletal outcomes</b> |      |       |                                                                           |                                                  |    |              |
| Cranney A                | 2007 | 25OHD | children, women of reproductive age, postmenopausal women and elderly men | Bone health in pregnant and lactating women      | 4  | Inconclusive |
| Cranney A                | 2007 | 25OHD | children, women of reproductive age, postmenopausal women and elderly men | Bone mineral content in infants                  | 3  | Inconclusive |
| Cranney A                | 2007 | 25OHD | children, women of reproductive age, postmenopausal women and elderly men | Bone mineral density                             | 13 | Suggestive   |
| Cranney A                | 2007 | 25OHD | children, women of reproductive age, postmenopausal women and elderly men | Bone mineral density in children and adolescents | 5  | Suggestive   |
| Cranney A                | 2007 | 25OHD | children, women of reproductive age, postmenopausal women and elderly men | Falls: risk of falling in older individuals      | 4  | Definite     |
| Cranney A                | 2007 | 25OHD | children, women of reproductive age, postmenopausal women and elderly men | Fractures in older individuals                   | 15 | Inconclusive |
| Cranney A                | 2007 | 25OHD | children, women of reproductive age, postmenopausal women and elderly men | Performance measures in older individuals        | 4  | Inconclusive |

|                       |      |       |                                                                                             |                                |    |              |
|-----------------------|------|-------|---------------------------------------------------------------------------------------------|--------------------------------|----|--------------|
|                       |      |       | children,<br>women of<br>reproductive<br>age,<br>postmenopausal<br>women and<br>elderly men |                                |    |              |
| Cranney A             | 2007 | 25OHD |                                                                                             | Rickets in children            | 12 | Definite     |
| <b>Other outcomes</b> |      |       |                                                                                             |                                |    |              |
| Yaghjian L            | 2012 | 25OHD | General<br>women)                                                                           | Mammographic<br>breast density | 14 | Inconclusive |
| Barnard K             | 2010 | 25OHD | older adults                                                                                | Mortality                      | 6  | Inconclusive |

**Supplementary Table G** General characteristics of 48 non overlapping meta-analyses of observational studies (MA: meta-analysis, RR: relative risk, OR: odds ratio, HR: hazard ratio, SMD: standardised mean difference, WMD: weighted mean difference, CI: confidence interval, CKD: chronic kidney disease)

| Author                 | Publication date | Vitamin D measurement | Population                 | Outcome                          | Unit of comparison         | Participants total | Events total | Type of metric | MA model | N of studies | Reported RR (95% CI) |
|------------------------|------------------|-----------------------|----------------------------|----------------------------------|----------------------------|--------------------|--------------|----------------|----------|--------------|----------------------|
| <b>Cancer outcomes</b> |                  |                       |                            |                                  |                            |                    |              |                |          |              |                      |
| Gilbert R              | 2011             | 25OHD                 | men                        | Aggressive prostate cancer       | per 10ng/ml                | 4524               | 871          | OR             | random   | 6            | 0.98 (0.84, 1.15)    |
| Gilbert R              | 2011             | 1,25(OH)2D            | men                        | Aggressive prostate cancer       | per 10ng/ml                | 1488               | 696          | OR             | random   | 2            | 0.86 (0.72, 1.02)    |
| Chen P                 | 2013             | 25OHD                 | General/<br>Hospital based | Breast cancer                    | highest vs lowest category | 26317              | 11771        | OR             | random   | 21           | 0.52 (0.40, 0.68)    |
| Chen P                 | 2010             | 1,25(OH)2D            | women                      | Breast cancer                    | highest vs lowest quartile | 3627               | 1802         | OR             | random   | 3            | 0.99 (0.68, 1.44)    |
| Bauer SR               | 2013             | 25OHD                 | post-menopausal women      | Breast cancer: Post - menopausal | per 5 ng/ml                | 3929               | 8766         | RR             | no info  | 9            | 0.97 (0.93, 1.00)    |
| Bauer SR               | 2013             | 25OHD                 | pre-menopausal women       | Breast cancer: Pre-menopausal    | per 5 ng/ml                | 1613               | 2890         | RR             | no info  | 6            | 0.99 (0.97, 1.04)    |
| Lee JE                 | 2011             | 25OHD                 | adults                     | Colon cancer                     | highest vs lowest category | 4578               | 1822         | OR             | random   | 10           | 0.77 (0.56, 1.07)    |
| Lee JE                 | 2011             | 1,25(OH)2D            | adults                     | Colon cancer                     | highest vs lowest category | no info            | no info      | OR             | no info  | 4            | 0.88 (0.57, 1.35)    |
| Yin L                  | 2011             | 25OHD                 | general                    | Colorectal adenoma               | per 20 ng/ml               | 7654               | 3539         | OR             | random   | 9            | 0.82 (0.69, 0.97)    |



|                            |      |       |                           |                                   |                            |         |      |     |        |    |                   |
|----------------------------|------|-------|---------------------------|-----------------------------------|----------------------------|---------|------|-----|--------|----|-------------------|
| Wang L                     | 2012 | 25OHD | general                   | Cardiovascular disease            | highest vs lowest category | 64994   | 6123 | RR  | random | 19 | 1.52 (1.30, 1.77) |
| Grandi NC                  | 2010 | 25OHD | adults                    | Cardiovascular disease mortality  | lowest vs highest category | 24387   | 2007 | HR  | random | 5  | 1.83 (1.19, 2.80) |
| Parker J                   | 2010 | 25OHD | general                   | Cardiovascular disease prevalence | highest vs lowest category | 64722   | 7600 | OR  | random | 16 | 0.67 (0.55, 0.81) |
| Kunutsor SK                | 2013 | 25OHD | general                   | Hypertension                      | highest vs lowest category | 48633   | 4965 | RR  | random | 7  | 0.70 (0.58, 0.86) |
| Brondum-Jacobsen P         | 2012 | 25OHD | adults                    | Ischemic heart disease            | lowest vs highest quartile | 82982   | 8376 | HR  | random | 18 | 1.39 (1.25, 1.54) |
| Brondum-Jacobsen P         | 2012 | 25OHD | general                   | Ischemic stroke                   | lowest vs highest quartile | 26596   | 1800 | HR  | random | 5  | 1.52 (1.26, 1.84) |
| Brondum-Jacobsen P         | 2012 | 25OHD | general                   | Ischemic stroke                   | lowest vs highest quartile | 31788   | 844  | OR  | random | 5  | 1.92 (1.64, 2.26) |
| Sun Q                      | 2012 | 25OHD | general                   | Stroke                            | highest vs lowest category | no info | 1214 | RR  | fixed  | 6  | 1.52 (1.20, 1.85) |
| <b>Cognitive disorders</b> |      |       |                           |                                   |                            |         |      |     |        |    |                   |
| Annweiler C                | 2013 | 25OHD | general                   | Alzheimer's disease               | per SD                     | 1005    | 357  | SMD | random | 10 | 1.40 (0.26, 2.54) |
| Etgen T                    | 2012 | 25OHD | adults                    | Cognition                         | lowest vs highest quartile | 7688    | 1135 | OR  | random | 7  | 2.39 (1.91, 3.00) |
| Anglin RE                  | 2013 | 25OHD | general (cross-sectional) | Depression                        | <50 vs >50 nmol/l          | 22476   | 2051 | OR  | random | 9  | 1.31 (1.00, 1.71) |

|                                                 |      |       |                          |                               |                            |       |      |         |        |    |                           |
|-------------------------------------------------|------|-------|--------------------------|-------------------------------|----------------------------|-------|------|---------|--------|----|---------------------------|
|                                                 |      |       | studies)                 |                               |                            |       |      |         |        |    |                           |
| Anglin RE                                       | 2013 | 25OHD | general (cohort studies) | Depression                    | <50 vs >50 nmol/Lt         | 8815  | 617  | HR      | random | 3  | 2.21 (1.40, 3.49)         |
| <b>Infectious diseases</b>                      |      |       |                          |                               |                            |       |      |         |        |    |                           |
| Nnoaham KE                                      | 2008 | 25OHD | adults                   | Active tuberculosis           | mean                       | 534   | 308  | SMD     | random | 7  | 0.68 (0.43, 0.93)         |
| <b>Metabolic disorders</b>                      |      |       |                          |                               |                            |       |      |         |        |    |                           |
| Saneei P                                        | 2013 | 25OHD | general                  | Body mass index               | correlation coefficients   | 16525 | n/a  | Z score | random | 37 | -0.15 (-0.19, -0.11)      |
| Parker J                                        | 2010 | 25OHD | general                  | Metabolic syndrome prevalence | highest vs lowest category | 31416 | 2821 | OR      | random | 8  | 0.49 (0.38, 0.64)         |
| Afzal S                                         | 2013 | 25OHD | general                  | Type 2 diabetes               | lowest vs highest category | 72204 | 4877 | OR      | random | 16 | 1.50 (1.33, 1.68)         |
| Parker J                                        | 2010 | 25OHD | general                  | Type 2 diabetes prevalence    | highest vs lowest category | 11892 | 2424 | OR      | random | 9  | 0.45 (0.25, 0.82)         |
| <b>Neonatal/ infant/ child related outcomes</b> |      |       |                          |                               |                            |       |      |         |        |    |                           |
| Aghajafari F                                    | 2013 | 25OHD | pregnant women           | Birth length                  | mean (cm)                  | 840   | n/a  | WMD     | fixed  | 2  | -0.19 (-0.65, 0.26)       |
| Aghajafari F                                    | 2013 | 25OHD | pregnant women           | Birth weight                  | mean (grams)               | 5541  | n/a  | WMD     | fixed  | 4  | -130.92 (-186.69, -75.14) |
| Aghajafari F                                    | 2013 | 25OHD | pregnant women           | Head circumference            | mean (cm)                  | 840   | n/a  | WMD     | fixed  | 2  | -0.05 (-0.34, 0.24)       |

|                                   |      |       |                   |                                          |                            |       |         |                             |               |    |                      |
|-----------------------------------|------|-------|-------------------|------------------------------------------|----------------------------|-------|---------|-----------------------------|---------------|----|----------------------|
| Aghajafari F                      | 2013 | 25OHD | pregnant women    | Small for gestational age                | lowest vs highest category | 6851  | no info | OR                          | fixed         | 6  | 1.85 (1.52, 2.26)    |
| <b>Pregnancy related outcomes</b> |      |       |                   |                                          |                            |       |         |                             |               |    |                      |
| Aghajafari F                      | 2013 | 25OHD | pregnant women    | Gestational diabetes                     | lowest vs highest category | 4112  | 687     | OR                          | fixed         | 10 | 1.49 (1.18, 1.89)    |
| Aghajafari F                      | 2013 | 25OHD | pregnant women    | Preeclampsia                             | lowest vs highest category | 3230  | 393     | OR                          | fixed         | 9  | 1.79 (1.25, 2.58)    |
| <b>Skeletal diseases</b>          |      |       |                   |                                          |                            |       |         |                             |               |    |                      |
| Weatherall M                      | 2000 | 25OHD | older individuals | Fractures                                | per SD                     | 2956  | 1572    | SMD                         |               |    | -0.66 (-0.74, -0.59) |
| Lai JK                            | 2010 | 25OHD | adults            | hip fracture (hospital-based controls)   | geometric mean (nmol/l)    | 2201  | 1116    | log ratio of geometric mean | random        | 8  | -0.26 (-0.33, -0.23) |
| Lai JK                            | 2010 | 25OHD | adults            | hip fracture (population-based controls) | geometric mean (nmol/l)    | 1655  | 818     | log ratio of geometric mean | random        | 9  | -0.51 (-0.64, -0.38) |
| <b>Other outcomes</b>             |      |       |                   |                                          |                            |       |         |                             |               |    |                      |
| Pilz S                            | 2011 | 25OHD | CKD patients      | Mortality                                | per 10 ng/ml               | 6853  | 2110    | RR                          | mixed effects | 10 | 0.86 (0.82, 0.91)    |
| Brondum-Jacobsen P                | 2012 | 25OHD | adults            | Mortality                                | lowest vs highest quartile | 77155 | 15447   | HR                          | random        | 17 | 1.46 (1.31, 1.64)    |



**Supplementary Table H** General characteristics of meta-analyses of observational studies for outcomes with more than one meta-analysis (RR: relative risk, OR: odds ratio, HR: hazard ratio, SMD: standardised mean difference, WMD: weighted mean difference, CI: confidence interval)

| Author                    | Date | Vitamin D measurement | Population                               | Unit of comparison         | Participants total | Events total | Type of metric | Meta-analysis model         | N total studies | Reported RR (95% CI) | Significant summary effect | In significant bias analysis |
|---------------------------|------|-----------------------|------------------------------------------|----------------------------|--------------------|--------------|----------------|-----------------------------|-----------------|----------------------|----------------------------|------------------------------|
| <b>Breast cancer</b>      |      |                       |                                          |                            |                    |              |                |                             |                 |                      |                            |                              |
| Chen P                    | 2013 | 25OHD                 | general/<br>Hospital based               | highest vs lowest quintile | 26317              | 11771        | OR             | random                      | 21              | 0.52 (0.40, 0.68)    | yes                        | yes                          |
| Chung M                   | 2011 | 25OHD                 | general                                  | per 10nmol/lt              | 4726               | 2363         | OR             | dose-response meta-analysis | 4               | 0.99 (0.97, 1.01)    | no                         | no                           |
| Gandini S                 | 2011 | 25OHD                 | general                                  | per 10ng/ml                | no info            | 6175         | RR             | random                      | 10              | 0.89 (0.81, 0.98)    | yes                        | no                           |
| Mohr S                    | 2011 | 25OHD                 | general                                  | highest vs lowest quintile | no info            | no info      | Peto OR        | no info                     | 11              | 0.61 (0.47, 0.80)    | yes                        | no                           |
| Yin L                     | 2010 | 25OHD                 | general                                  | per 20 ng/mL               | 12901              | 6147         | OR             | random                      | 9               | 0.73 (0.60, 0.88)    | yes                        | no                           |
| Chen P                    | 2010 | 25OHD                 | general                                  | highest vs lowest quartile | 11330              | 5489         | OR             | random                      | 7               | 0.55 (0.38, 0.80)    | yes                        | no                           |
| <b>Colorectal adenoma</b> |      |                       |                                          |                            |                    |              |                |                             |                 |                      |                            |                              |
| Fedirko V                 | 2010 | 25OHD                 | adults with no colorectal cancer history | highest vs lowest quartile | 1386               | 616          | OR             | pooled meta-analysis        | 3               | 0.59 (0.41, 0.84)    | yes                        | no                           |
| Wei M                     | 2008 | 25OHD                 | general                                  | highest vs lowest quintile | 3787               | 2628         | OR             | random                      | 7               | 0.70 (0.56, 0.87)    | yes                        | no                           |





|                                    |      |       |                |                            |         |         |    |        |                       |                   |     |     |
|------------------------------------|------|-------|----------------|----------------------------|---------|---------|----|--------|-----------------------|-------------------|-----|-----|
| Forouhi NG                         | 2012 | 25OHD | adults         | highest vs lowest quartile | 55713   | 3612    | RR | random | 11                    | 0.59 (0.52, 0.67) | yes | no  |
| Mitri J                            | 2011 | 25OHD | adults         | >25 vs <14ng/ml            | 5664    | 1153    | RR | random | 5 cohorts (4 studies) | 0.57 (0.43, 0.76) | yes | no  |
| Afzal S                            | 2013 | 25OHD | general        | lowest vs highest category | 72204   | 4877    | OR | random | 16                    | 1.50 (1.33, 1.68) | yes | yes |
| <b>Type 2 diabetes (prevalent)</b> |      |       |                |                            |         |         |    |        |                       |                   |     |     |
| Pittas AG                          | 2007 | 25OHD | general        | 25–38 vs. 10–23 ng/ml      | no info | no info | OR | random | 4                     | 0.36 (0.16, 0.80) | yes | No  |
| Parker J                           | 2010 | 25OHD | general        | highest vs lowest category | no info | 11892   | OR | random | 9                     | 0.45 (0.25, 0.82) | yes | yes |
| <b>Gestational diabetes</b>        |      |       |                |                            |         |         |    |        |                       |                   |     |     |
| Aghajafari F                       | 2013 | 25OHD | pregnant women | lowest vs highest category | 4112    | 687     | OR | fixed  | 10                    | 1.49 (1.18, 1.89) | yes | yes |
| Poel YHM                           | 2012 | 25OHD | Pregnant women | <50nmol/lt                 | 2146    | 433     | OR | random | 7                     | 1.61 (1.19, 2.17) | yes | no  |

**Supplementary table I** Excess significance bias analysis of 40 meta-analyses (based on effect from the largest study; OR: odds ratio, HR: hazards ratio)

| Variable                                | Outcome group | Number of Studies | Number of meta-analyses | Expected Significant | Observed significant | Observed/expected | p-value              |
|-----------------------------------------|---------------|-------------------|-------------------------|----------------------|----------------------|-------------------|----------------------|
| All meta-analyses                       |               | 369               | 40                      | 218                  | 158                  | 0.72              |                      |
| <b>Outcome</b>                          |               |                   |                         |                      |                      |                   |                      |
| <i>Cancer</i>                           |               |                   |                         |                      |                      |                   |                      |
| Aggressive prostate cancer              | 2             | 6                 | 1                       | 0.7                  | 1                    | 1.52              | 0.66                 |
| Aggressive prostate cancer (1,25(OH)2D) | 2             | 2                 | 1                       | 0.8                  | 0                    | 0.00              |                      |
| Breast cancer                           | 2             | 21                | 1                       | 20.9                 | 13                   | 0.62              |                      |
| Breast cancer (1,25(OH)2D)              | 2             | 3                 | 1                       | 1.4                  | 0                    | 0.00              |                      |
| Breast cancer: Post-menopausal          | 2             | 9                 | 1                       | 9                    | 0                    | 0.00              |                      |
| Breast cancer: Pre-menopausal           | 2             | 6                 | 1                       | 6                    | 1                    | 0.17              |                      |
| Colon cancer                            | 2             | 10                | 1                       | 9.0                  | 2                    | 0.22              |                      |
| Colorectal cancer                       | 2             | 10                | 1                       | 3.8                  | 0                    | 0.00              |                      |
| Kidney cancer                           | 2             | 6                 | 1                       | 3.2                  | 0                    | 0.00              |                      |
| Non-Hodgkin Lymphoma                    | 2             | 6                 | 1                       | 0.5                  | 1                    | 2.17              | 0.41                 |
| Non-Hodgkin Lymphoma                    | 2             | 4                 | 1                       | 0.2                  | 0                    | 0.00              |                      |
| Ovarian cancer                          | 2             | 10                | 1                       | 4.9                  | 0                    | 0.00              |                      |
| Pancreatic cancer                       | 2             | 6                 | 1                       | 0.6                  | 1                    | 1.75              | 0.55                 |
| Prostate cancer                         | 2             | 14                | 1                       | 2.6                  | 0                    | 0.00              |                      |
| Prostate cancer (1,25(OH)2D)            | 2             | 7                 | 1                       | 0.4                  | 1                    | 2.50              | 0.26                 |
| Rectal cancer                           | 2             | 9                 | 1                       | 0.7                  | 2                    | 2.86              | 0.10                 |
| Sporadic colorectal adenoma             | 2             | 9                 | 1                       | 3.6                  | 4                    | 1.11              | 0.76                 |
| Sporadic colorectal adenoma recurrence  | 2             | 3                 | 1                       | 0.2                  | 1                    | 5.26              | 0.05                 |
| <i>Cardiovascular diseases</i>          |               |                   |                         |                      |                      |                   |                      |
| Cardiovascular disease                  | 3             | 19                | 1                       | 17.2                 | 8                    | 0.47              |                      |
| Cardiovascular disease mortality        | 3             | 5                 | 1                       | 2.5                  | 3                    | 1.20              | 0.62                 |
| Cardiovascular disease prevalent        | 3             | 16                | 1                       | 15.3                 | 11                   | 0.72              |                      |
| Hypertension                            | 3             | 7                 | 1                       | 6.4                  | 3                    | 0.47              |                      |
| Ischemic heart disease                  | 3             | 19                | 1                       | 8.1                  | 12                   | 1.48              | 0.07                 |
| Ischemic stroke (HR)                    | 3             | 5                 | 1                       | 2.7                  | 3                    | 1.11              | 0.76                 |
| Ischemic stroke (OR)                    | 3             | 5                 | 1                       | 3.8                  | 4                    | 1.05              | 0.81                 |
| Stroke                                  | 3             | 7                 | 1                       | 4.3                  | 3                    | 0.70              |                      |
| <i>Cognition disorders</i>              |               |                   |                         |                      |                      |                   |                      |
| Alzheimer's diseases                    | 4             | 7                 | 1                       | 0.9                  | 5                    | 5.56              | 3.8x10 <sup>-6</sup> |
| Cognition                               | 4             | 7                 | 1                       | 6.5                  | 7                    | 1.08              | 0.47                 |

|                                                 |    |     |    |      |     |      |                      |
|-------------------------------------------------|----|-----|----|------|-----|------|----------------------|
| Depression (case-control studies)               | 4  | 9   | 1  | 2.0  | 3   | 1.50 | 0.40                 |
| Depression (cohort studies)                     | 4  | 3   | 1  | 3.0  | 2   | 0.67 |                      |
| <i>Infectious diseases</i>                      |    |     |    |      |     |      |                      |
| Tuberculosis                                    | 5  | 7   | 1  | 4.6  | 5   | 1.09 | 0.72                 |
| <i>Metabolic diseases</i>                       |    |     |    |      |     |      |                      |
| Metabolic syndrome prevalent                    | 6  | 8   | 1  | 8    | 4.0 | 0.50 |                      |
| Type 2 diabetes                                 | 6  | 16  | 1  | 9.5  | 6   | 0.63 |                      |
| Type 2 diabetes prevalent                       | 6  | 9   | 1  | 9.0  | 5   | 0.56 |                      |
| <i>Neonatal/ infant/ child related outcomes</i> |    |     |    |      |     |      |                      |
| Small for gestational age                       | 7  | 6   | 1  | 4.9  | 4   | 0.82 |                      |
| <i>Pregnancy related outcomes</i>               |    |     |    |      |     |      |                      |
| Gestational diabetes                            | 8  | 10  | 1  | 8.4  | 2   | 0.24 |                      |
| Preeclampsia                                    | 8  | 7   | 1  | 5.3  | 1   | 0.19 |                      |
| <i>Skeletal outcomes</i>                        |    |     |    |      |     |      |                      |
| Fractures                                       | 9  | 28  | 1  | 9.0  | 19  | 2.11 | 6.2x10 <sup>-5</sup> |
| <i>Other</i>                                    |    |     |    |      |     |      |                      |
| All-cause mortality in CKD patients             | 7  | 10  | 1  | 6.2  | 6   | 0.97 |                      |
| All-cause mortality                             | 7  | 18  | 1  | 12.0 | 15  | 1.25 | 0.13                 |
| <b>Outcome group</b>                            |    |     |    |      |     |      |                      |
| Cancer                                          | 2  | 141 | 18 | 68.3 | 27  | 0.40 |                      |
| Cardiovascular diseases                         | 3  | 83  | 8  | 60.2 | 47  | 0.78 |                      |
| Cognition disorders                             | 4  | 26  | 4  | 12.4 | 17  | 1.37 | 0.07                 |
| Infectious diseases                             | 5  | 7   | 1  | 4.6  | 5   | 1.09 | 0.72                 |
| Metabolic diseases                              | 6  | 33  | 3  | 26.5 | 15  | 0.57 |                      |
| Neonatal/ infant/ child related outcomes        | 7  | 6   | 1  | 4.9  | 4   | 0.82 |                      |
| Pregnancy related outcomes                      | 8  | 17  | 2  | 13.7 | 3   | 0.22 |                      |
| Skeletal outcomes                               | 9  | 28  | 1  | 9.1  | 19  | 2.09 | 6.2x10 <sup>-5</sup> |
| Other                                           | 10 | 28  | 2  | 18.2 | 21  | 1.15 | 0.27                 |
| <b>Heterogeneity</b>                            |    |     |    |      |     |      |                      |
| I <sup>2</sup> ≤50%                             |    | 185 | 25 | 107  | 47  | 0.44 |                      |
| I <sup>2</sup> >50%                             |    | 184 | 15 | 111  | 111 | 1.00 | 0.94                 |
| <b>Statistically significant summary effect</b> |    |     |    |      |     |      |                      |
| Yes                                             |    | 277 | 26 | 178  | 150 | 0.84 |                      |
| No                                              |    | 92  | 14 | 39.3 | 8   | 0.20 |                      |
| <b>Type of biomarker</b>                        |    |     |    |      |     |      |                      |
| 1,25(OH)2D                                      |    | 12  | 3  | 2.6  | 1   | 0.38 |                      |
| 25OHD                                           |    | 357 | 37 | 215  | 157 | 0.73 |                      |

**Supplementary Table J:** General characteristics of meta-analyses of RCTs for outcomes with more than one meta-analysis (RR: relative risk, OR: odds ratio, HR: hazard ratio, SMD: standardised mean difference, WMD: weighted mean difference, CI: confidence interval)

| Author                        | Date | Compound                                                           | Versus                      | Population                               | Outcome                          | Participants total | Events total | Type of metric | Meta-analysis model | N of studies | Reported RR (95% CI) |
|-------------------------------|------|--------------------------------------------------------------------|-----------------------------|------------------------------------------|----------------------------------|--------------------|--------------|----------------|---------------------|--------------|----------------------|
| <b>Cardiovascular disease</b> |      |                                                                    |                             |                                          |                                  |                    |              |                |                     |              |                      |
| Wang L                        | 2010 | vitamin D                                                          | placebo                     | general population                       | Cardiovascular disease           | 2988               | 991          | RR             | fixed               | 2            | 0.90 (0.77, 1.05)    |
| Myung SK                      | 2013 | vitamin D                                                          | placebo                     | general population                       | Cardiovascular disease           | no info            | no info      | RR             | fixed               | 2            | 0.95 (0.86, 1.05)    |
| <b>Hypertension</b>           |      |                                                                    |                             |                                          |                                  |                    |              |                |                     |              |                      |
| Pittas AG                     | 2010 | vitamin D2 and vitamin D3                                          | placebo                     | general population                       | Diastolic blood pressure (mm Hg) | no info            | NA           | WMD            | no info             | no info      | -0.43 (-1.39, 0.53)  |
| Witham MD                     | 2009 | Alphacalcidol or vitamin D3 or UVA + UVB (or vitamin D3 + calcium) | placebo or UVA (or calcium) | hypertensive individuals                 | Diastolic blood pressure (mm Hg) | 545                | NA           | WMD            | random              | 8            | -3.05 (-5.50, -0.60) |
| Wu SH                         | 2010 | vitamin D                                                          | placebo                     | normotensive or hypertensive individuals | Diastolic blood pressure (mm Hg) | 366                | NA           | WMD            | no info             | 3            | -0.03 (-1.98, 1.92)  |

|                     |      |                                                                    |                             |                                          |                                 |         |         |     |         |         |                         |
|---------------------|------|--------------------------------------------------------------------|-----------------------------|------------------------------------------|---------------------------------|---------|---------|-----|---------|---------|-------------------------|
| Pittas AG           | 2010 | vitamin D2 and vitamin D3                                          | placebo                     | general population                       | Systolic blood pressure (mm Hg) | no info | NA      | WMD | no info | no info | -2.60 (-6.60, 1.09)     |
| Witham MD           | 2009 | Alphacalcidol or vitamin D3 or UVA + UVB (or vitamin D3 + calcium) | placebo or UVA (or calcium) | hypertensive individuals                 | Systolic blood pressure (mm Hg) | 545     | NA      | WMD | random  | 8       | -3.63 (-8.00, 0.74)     |
| Wu SH               | 2010 | vitamin D                                                          | placebo                     | normotensive or hypertensive individuals | Systolic blood pressure (mm Hg) | 366     | NA      | WMD | no info | 3       | -2.39 (-5.70, 0.90)     |
| <b>Birth weight</b> |      |                                                                    |                             |                                          |                                 |         |         |     |         |         |                         |
| De-Regil LM         | 2012 | vitamin D alone or in combination with other micronutrients        | placebo or no treatment     | pregnant women                           | Birth weight (grams)            | 403     | NA      | WMD | random  | 3       | 39.55 (-240.68, 319.78) |
| De-Regil LM         | 2012 | vitamin D alone or in combination with other micronutrients        | placebo or no treatment     | pregnant women                           | Birth weight                    | 463     | no info | RR  | random  | 3       | 0.48 (0.23, 1.01)       |
| Thorne-Lyman A      | 2012 | vitamin D                                                          | placebo                     | pregnant women                           | Birth weight                    | 507     | 55      | RR  | fixed   | 3       | 0.4 (0.23, 0.71)        |
| <b>Preterm</b>      |      |                                                                    |                             |                                          |                                 |         |         |     |         |         |                         |



|                     |      |                                                                                              |                      |                |                                          |         |         |     |         |    |                    |
|---------------------|------|----------------------------------------------------------------------------------------------|----------------------|----------------|------------------------------------------|---------|---------|-----|---------|----|--------------------|
| <b>delivery</b>     |      |                                                                                              |                      |                |                                          |         |         |     |         |    |                    |
| Thorne-Lyman A      | 2012 | vitamin D                                                                                    | placebo              | pregnant women | Mean gestational age at delivery (weeks) | 529     | NA      | WMD | fixed   | 2  | 0.17 (-0.16, 0.51) |
| Thorne-Lyman A      | 2012 | vitamin D                                                                                    | placebo              | pregnant women | Preterm delivery                         | 529     | 28      | RR  | fixed   | 2  | 0.77 (0.35, 1.66)  |
| <b>Falls</b>        |      |                                                                                              |                      |                |                                          |         |         |     |         |    |                    |
| Bischoff-Ferrari HA | 2009 | vitamin D3 or vitamin D2 (or vitamin D3 or vitamin D2 + calcium)                             | placebo (or calcium) | older adults   | Falls                                    | 1476    | no info | RR  | no info | 6  | 0.77 (0.65, 0.92)  |
| Bischoff-Ferrari HA | 2009 | Active form of vitamin D                                                                     | placebo              | older adults   | Falls                                    | 624     | 223     | RR  | no info | 2  | 0.78 (0.64, 0.94)  |
| Bischoff-Ferrari HA | 2004 | vitamin D or active vitamin D analogue (or vitamin D or active vitamin D analogue + calcium) | placebo (or calcium) | older adults   | Falls                                    | 1237    | no info | RR  | no info | 5  | 0.69 (0.53, 0.88)  |
| Kalyani RR          | 2010 | vitamin D                                                                                    | placebo              | older adults   | Falls                                    | 9508    | no info | RR  | random  | 7  | 1.01 (0.96, 1.07)  |
| Murad MH            | 2011 | vitamin D2 and vitamin                                                                       | placebo              | older adults   | Falls                                    | no info | no info | OR  | random  | 10 | 0.97 (0.84, 1.11)  |



|                  |      |                               |                                    |                                                    |                      |       |         |     |        |    |                   |
|------------------|------|-------------------------------|------------------------------------|----------------------------------------------------|----------------------|-------|---------|-----|--------|----|-------------------|
| Cameron ID       | 2012 | vitamin D3 or D2 plus calcium | calcium                            | older individuals in care facilities or hospitals  | Falls: Rate of falls | 747   | no info | RaR | random | 2  | 0.71 (0.56, 0.90) |
| Cameron ID       | 2012 | vitamin D2                    | usual care or placebo              | older individuals in care facilities or hospitals  | Falls: Rate of falls | 3765  | no info | RaR | random | 2  | 0.55 (0.19, 1.64) |
| Gillespie LD     | 2012 | vitamin D3                    | placebo or control                 | older people in the community                      | Falls: Rate of falls | 2478  | no info | RaR | random | 2  | 1.14 (1.03, 1.27) |
| <b>Fractures</b> |      |                               |                                    |                                                    |                      |       |         |     |        |    |                   |
| Avenell A        | 2009 | Vitamin D2, D3 or 25OHD       | placebo or no intervention         | Men over 65 years of age and post-menopausal women | Fractures            | 25016 | 2195    | RR  | fixed  | 10 | 1.01 (0.93, 1.09) |
| Chung M          | 2011 | vitamin D                     | placebo                            | community dwelling or institutionalised adults     | Fractures            | 14583 | 1235    | RR  | random | 5  | 1.03 (0.84, 1.26) |
| DIPART group     | 2010 | vitamin D2 or D3              | placebo or leaflet or no treatment | general population                                 | Fractures            | 19316 | no info | HR  | fixed  | 4  | 1.01 (0.92, 1.12) |

|                       |      |                                                    |                                      |                                                    |                |         |         |    |         |   |                    |
|-----------------------|------|----------------------------------------------------|--------------------------------------|----------------------------------------------------|----------------|---------|---------|----|---------|---|--------------------|
| Gillespie LD          | 2012 | vitamin D3                                         | placebo or control                   | older people in the community                      | Fractures      | 4942    | no info | RR | random  | 2 | 0.97 (0.63, 1.51)  |
| Gillespie LD          | 2012 | vitamin D3 + calcium                               | calcium                              | older people in the community                      | Fractures      | 379     | no info | RR | random  | 2 | 0.54 (0.26, 1.15)  |
| Palmer SC             | 2009 | established and newer vitamin D compounds          | placebo, no treatment                | chronic kidney disease requiring dialysis          | Fractures      | 181     | no info | RR | fixed   | 4 | 1.00 (0.06, 15.41) |
| <b>Fractures: hip</b> |      |                                                    |                                      |                                                    |                |         |         |    |         |   |                    |
| Avenell A             | 2009 | Vitamin D2, D3 or 25OHD                            | placebo or no intervention           | Men over 65 years of age and post-menopausal women | Fractures: hip | 24749   | 695     | RR | fixed   | 9 | 1.15 (0.99, 1.33)  |
| Bergman GJ            | 2010 | vitamin D3 (with calcium)                          | calcium                              | older women                                        | Fractures: hip | no info | no info | OR | random  | 2 | 1.12 (0.23, 3.04)  |
| DIPART group          | 2010 | vitamin D2 or D3                                   | placebo or leaflet or no treatment   | general population                                 | Fractures: hip | 19316   | no info | HR | fixed   | 4 | 1.09 (0.92, 1.29)  |
| Lai JK                | 2010 | vitamin D2 or D3 (or vitamin D2 or D3 and calcium) | placebo or no treatment (or calcium) | older adults                                       | Fractures: hip | 28324   | 801     | RR | no info | 8 | 1.13 (0.98, 1.29)  |

|                                     |      |                                                                                                                            |                                  |                       |                             |         |            |    |         |    |                   |
|-------------------------------------|------|----------------------------------------------------------------------------------------------------------------------------|----------------------------------|-----------------------|-----------------------------|---------|------------|----|---------|----|-------------------|
| <b>Fractures:<br/>Non-vertebral</b> |      |                                                                                                                            |                                  |                       |                             |         |            |    |         |    |                   |
| Bergman GJ                          | 2010 | vitamin D3<br>(with calcium)                                                                                               | calcium                          | older women           | Fractures:<br>Non-vertebral | no info | no<br>info | OR | random  | 2  | 0.73 (0.17, 1.90) |
| Bischoff-<br>Ferrari HA             | 2009 | vitamin D3 or<br>vitamin D2 or<br>active vitamin<br>D (vitamin D3<br>or vitamin D2<br>or active<br>vitamin D +<br>calcium) | placebo (or<br>calcium)          | people >65            | Fractures:<br>Non-vertebral | 7130    | 610        | RR | no info | 5  | 0.79 (0.63, 0.99) |
| <b>Mortality</b>                    |      |                                                                                                                            |                                  |                       |                             |         |            |    |         |    |                   |
| Autier P                            | 2007 | vitamin D                                                                                                                  | placebo or<br>no vitamin<br>D    | general<br>population | Mortality                   | 7276    | 1452       | RR | random  | 5  | 0.91 (0.78, 1.06) |
| Bjelakovic G                        | 2011 | vitamin D3                                                                                                                 | placebo or<br>no<br>intervention | general<br>population | Mortality                   | 12824   | 1703       | RR | random  | 9  | 0.91 (0.82, 1.02) |
| Bjelakovic G                        | 2011 | vitamin D2                                                                                                                 | placebo or<br>no<br>intervention | general<br>population | Mortality                   | 17079   | 2850       | RR | random  | 8  | 1.04 (0.97, 1.11) |
| Elamin MB                           | 2011 | vitamin D                                                                                                                  | placebo or<br>no<br>treatment    | general<br>population | Mortality                   | 13277   | 1865       | RR | random  | 10 | 0.97 (0.90, 1.04) |

|                                                                    |      |                                           |                       |                                               |                              |       |      |     |                              |   |                           |
|--------------------------------------------------------------------|------|-------------------------------------------|-----------------------|-----------------------------------------------|------------------------------|-------|------|-----|------------------------------|---|---------------------------|
| Rejnmark L                                                         | 2012 | vitamin D                                 | placebo               | older adults                                  | Mortality                    | 15515 | 1653 | HR  | participation level analysis | 4 | 0.96 (0.87, 1.06)         |
| <b>Chronic kidney disease patients: Parathyroid hormone levels</b> |      |                                           |                       |                                               |                              |       |      |     |                              |   |                           |
| Palmer SC                                                          | 2009 | established and newer vitamin D compounds | placebo, no treatment | chronic kidney disease not requiring dialysis | Parathyroid hormone (pmol/l) | 153   | NA   | WMD | fixed                        | 4 | -49.34 (-85.7, -12.97)    |
| Palmer SC                                                          | 2009 | established and newer vitamin D compounds | placebo, no treatment | chronic kidney disease requiring dialysis     | Parathyroid hormone (pmol/l) | 212   | NA   | WMD | fixed                        | 6 | -196.05 (-298.43, -93.66) |
| Kandula P                                                          | 2011 | vitamin D (no active compounds)           | placebo               | chronic kidney disease patients               | Parathyroid hormone (pmol/l) | 177   | NA   | WMD | random                       | 4 | -31.53 (-57.01, -6.05)    |

**Supplementary Figure A** Correlation between the summary relative risk in each meta-analysis (random effects) and the relative risk in the largest study. Axes are in logarithmic scale.

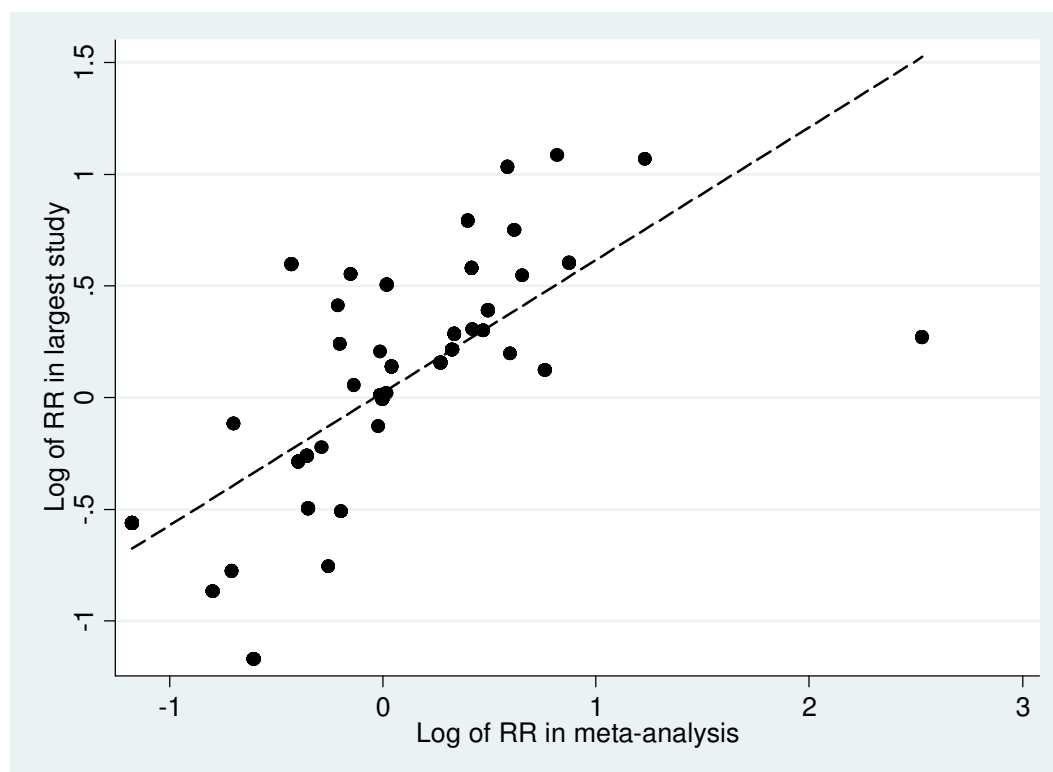

Supplement: thee017309.ww1_default.pdf [file thee017309.ww1_default.pdf]
